# Supplementary material for: Multiplex Analysis of Serum Cytokine Profiles in Systemic Lupus Erythematosus and Multiple Sclerosis
Source: MDPI journal article supplement (doi:10.3390/ijms232213829), 2022-11-10
Supplement: s1 [file s1]

# Supplement Figures

Article

## Multiplex Analysis of Serum Cytokine Profiles in Systemic Lupus Erythematosus and Multiple Sclerosis

Mark M. Melamud <sup>1,†</sup>, Evgeny A. Ermakov <sup>1,†</sup>, Anastasiia S. Boiko <sup>2</sup>, Daria A. Kamaeva <sup>2</sup>, Alexey E. Sizikov <sup>3</sup>, Svetlana A. Ivanova <sup>2</sup>, Natalia M. Baulina <sup>4</sup>, Olga O. Favorova <sup>4</sup>, Georgy A. Nevinsky <sup>1</sup> and Valentina N. Buneva <sup>1,\*</sup>

<sup>1</sup> Institute of Chemical Biology and Fundamental Medicine, Siberian Branch of the Russian Academy of Sciences, 630090 Novosibirsk, Russia

<sup>2</sup> Mental Health Research Institute, Tomsk National Research Medical Center of the Russian Academy of Sciences, 634014 Tomsk, Russia

<sup>3</sup> Institute of Clinical Immunology, Siberian Branch of the Russian Academy of Sciences, 630099 Novosibirsk, Russia

<sup>4</sup> Pirogov Russian National Research Medical University, 117997 Moscow, Russia

\* Correspondence: buneva@niboch.nsc.ru (V.N.B.); Tel.: +7-383-363-51-27

† These authors contributed equally to this work.

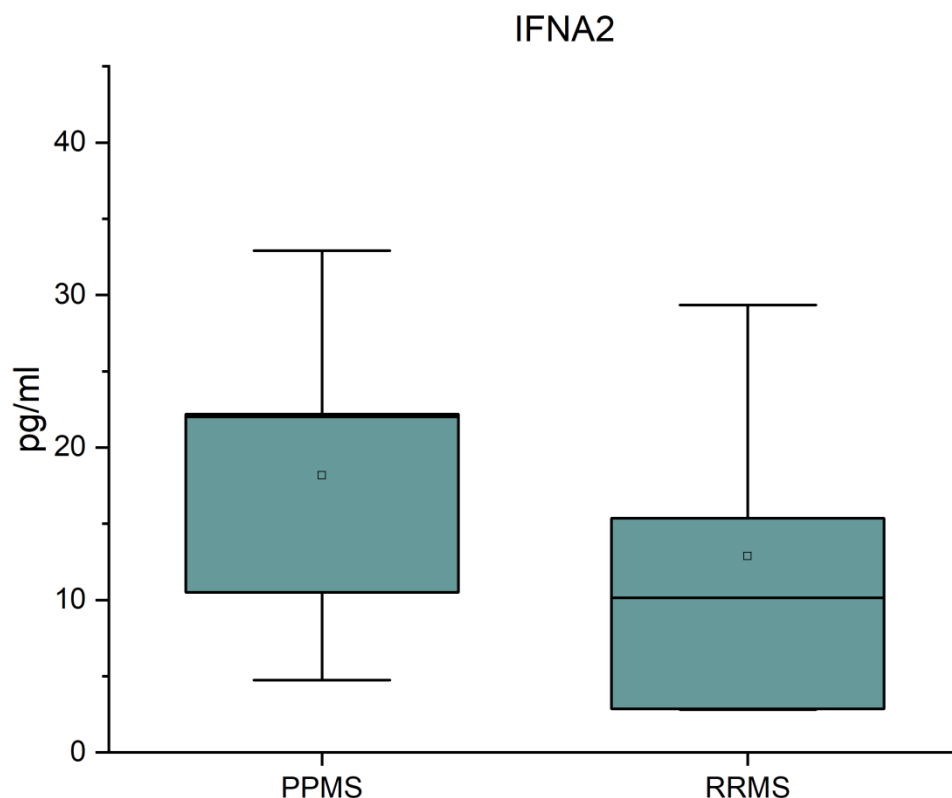

**Figure S1.** The concentration of IFN $\alpha$ 2 in the serum of patients depending on the type of multiple sclerosis (n = 20 for PPMS and n = 36 for RRMS). PPMS – Primary Progressive Multiple Sclerosis, RRMS – Relapsing-remitting Multiple Sclerosis.

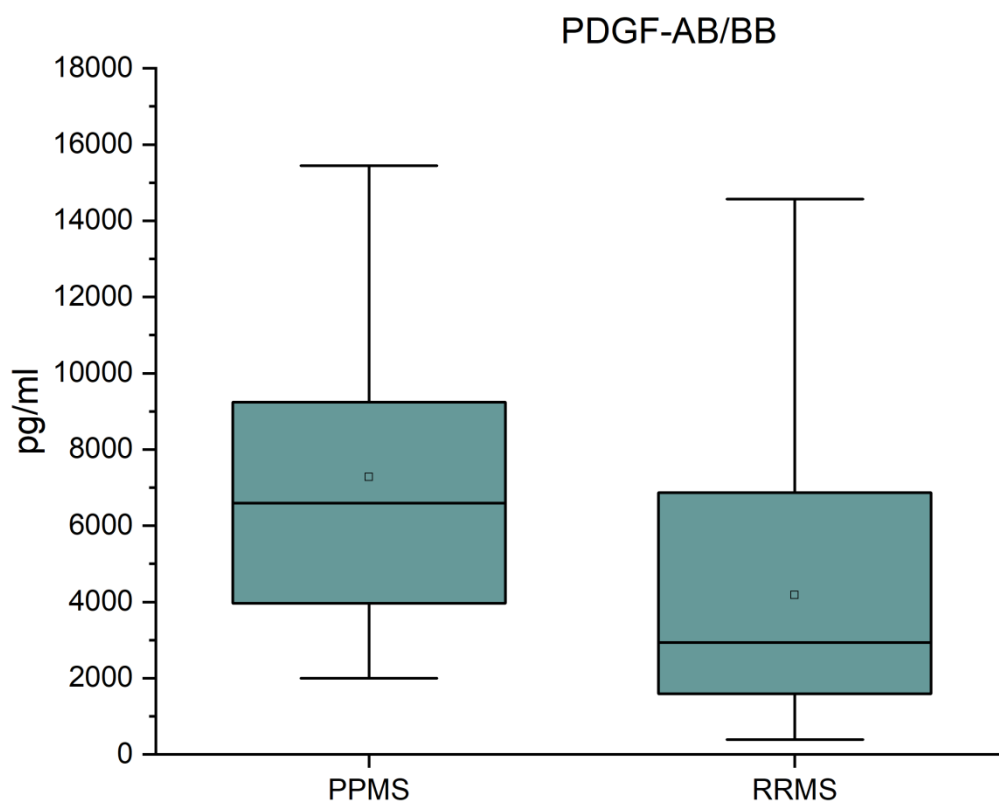

**Figure S2.** The concentration of PDGF-AB/BB in the serum of patients depending on the type of multiple sclerosis (n = 20 for PPMS and n = 36 for RRMS). PPMS – Primary Progressive Multiple Sclerosis, RRMS – Relapsing-remitting Multiple Sclerosis.

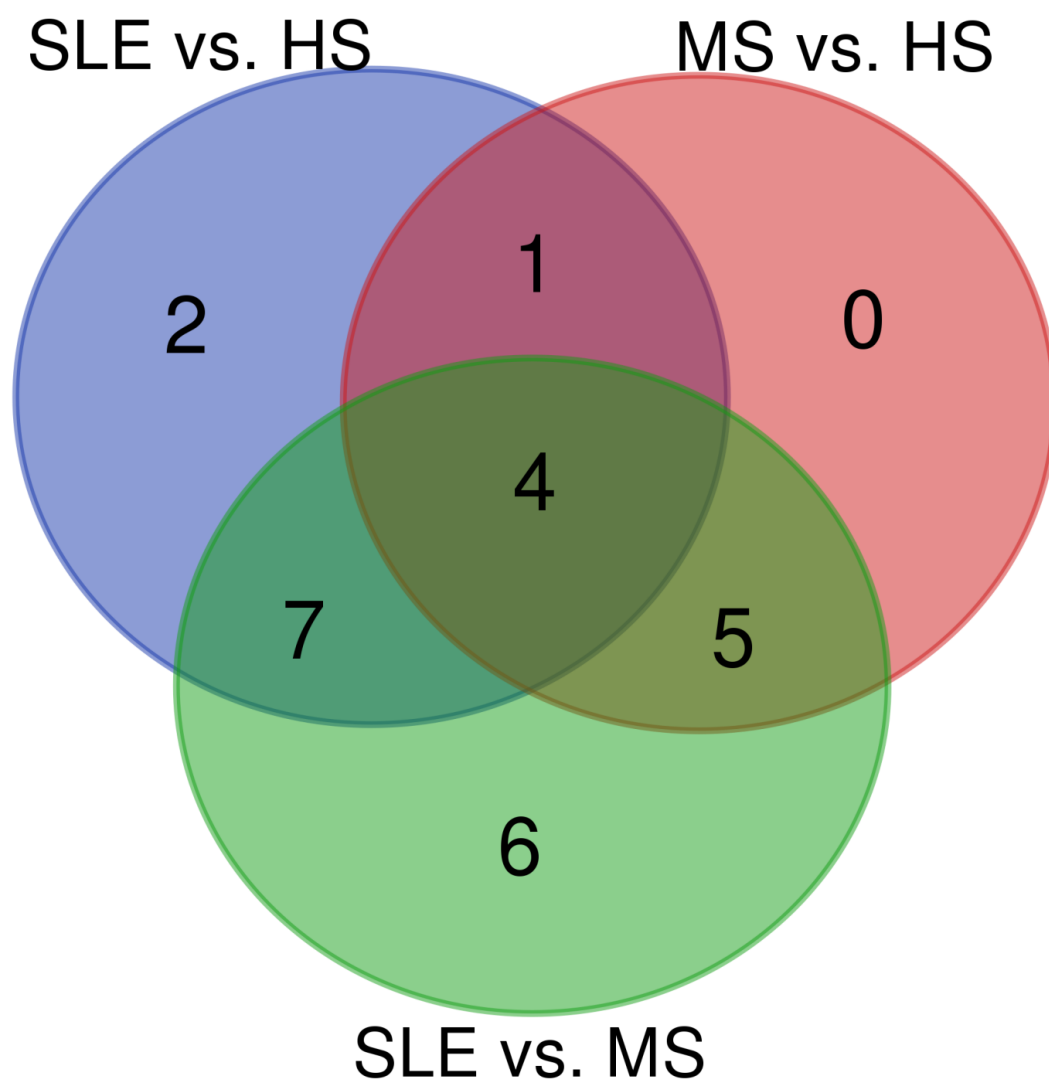

**Figure S3.** Venn diagram showing the number of overlapping significantly changed cytokines in different comparison groups.

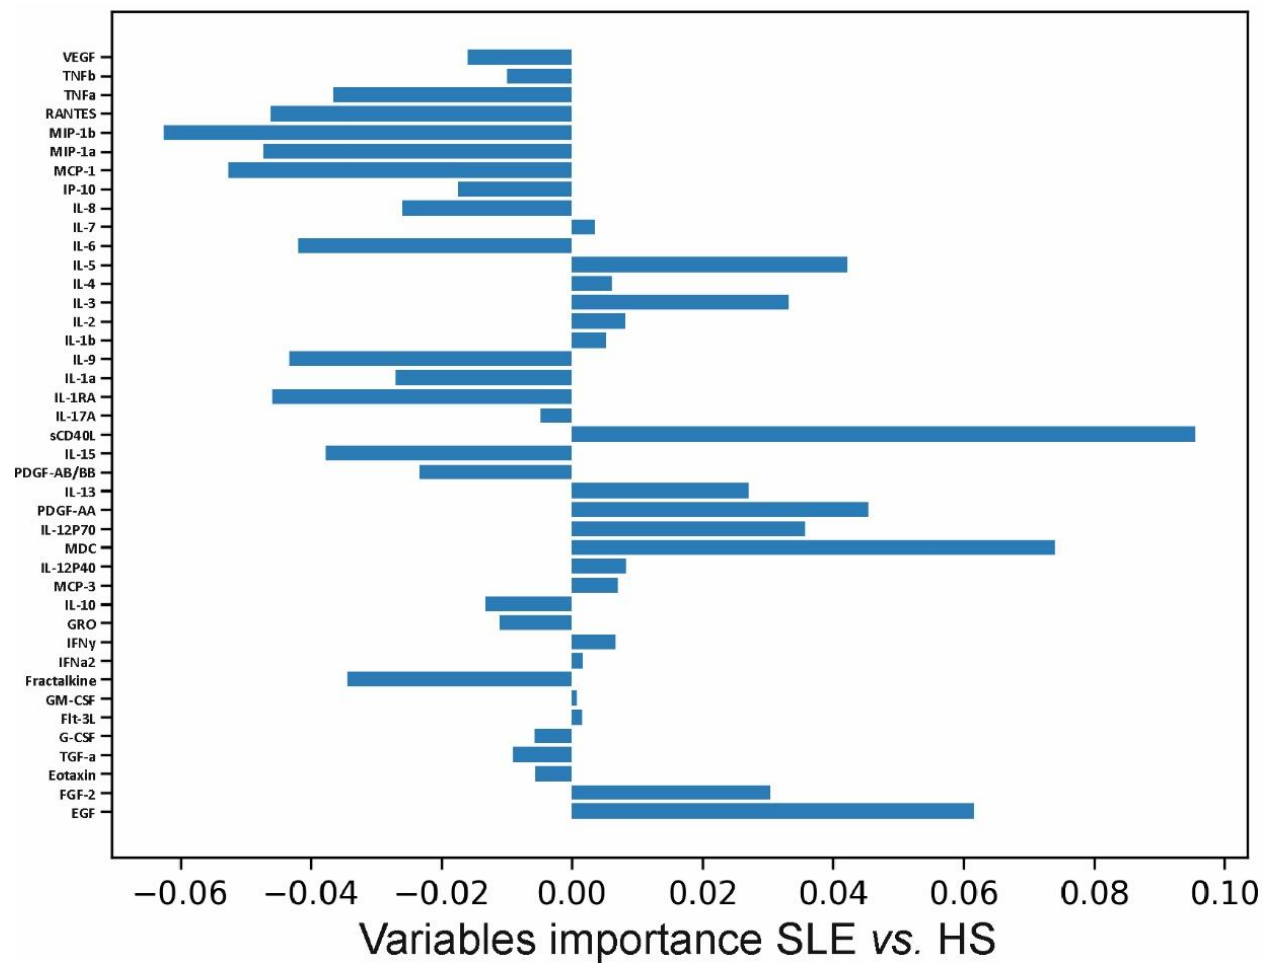

**Figure S4.** Variables importance in PLS-DA comparing SLE vs. HS groups.

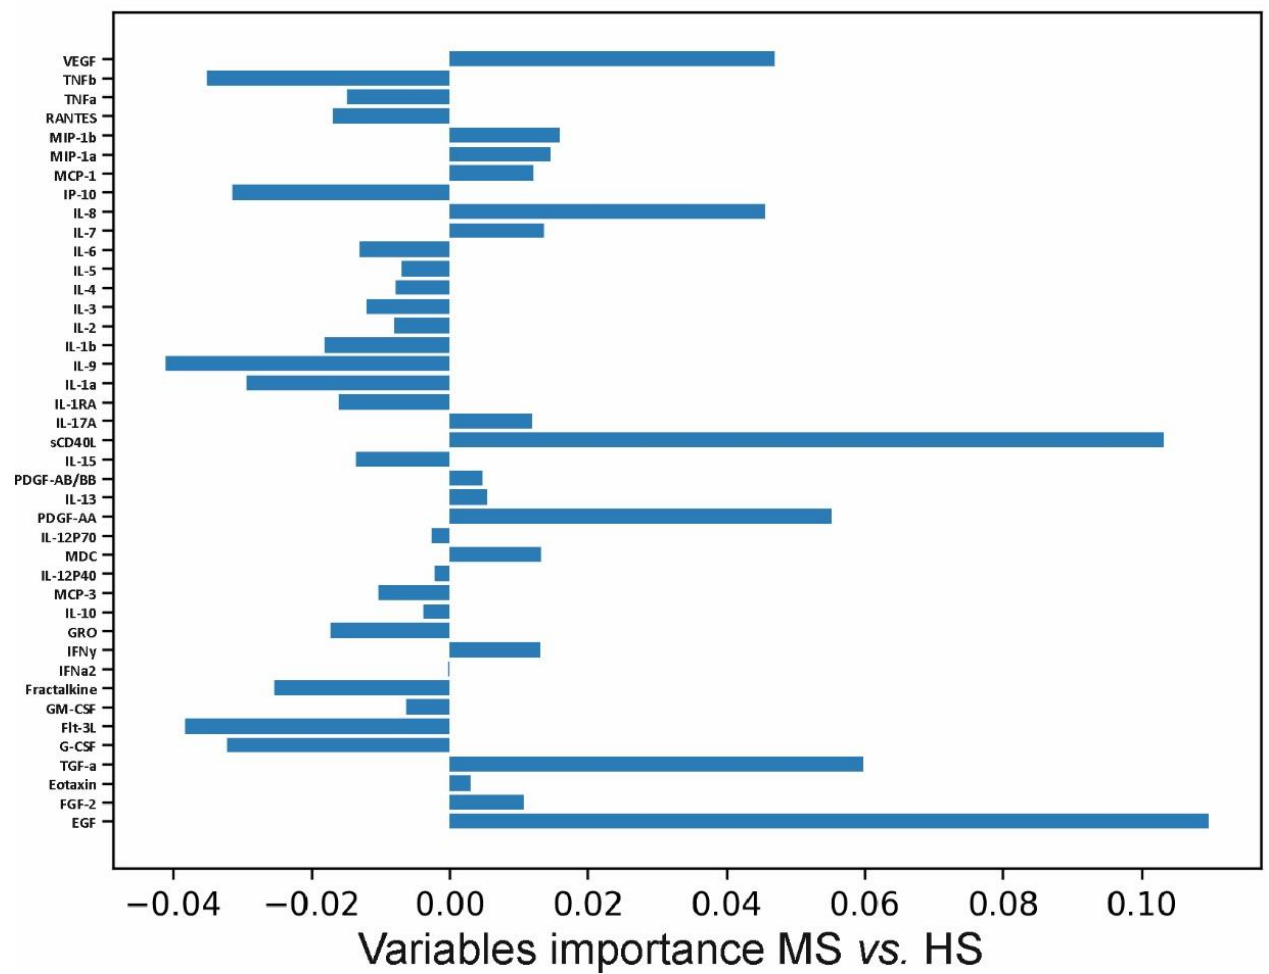

**Figure S5.** Variables importance in PLS-DA comparing MS vs. HS groups.

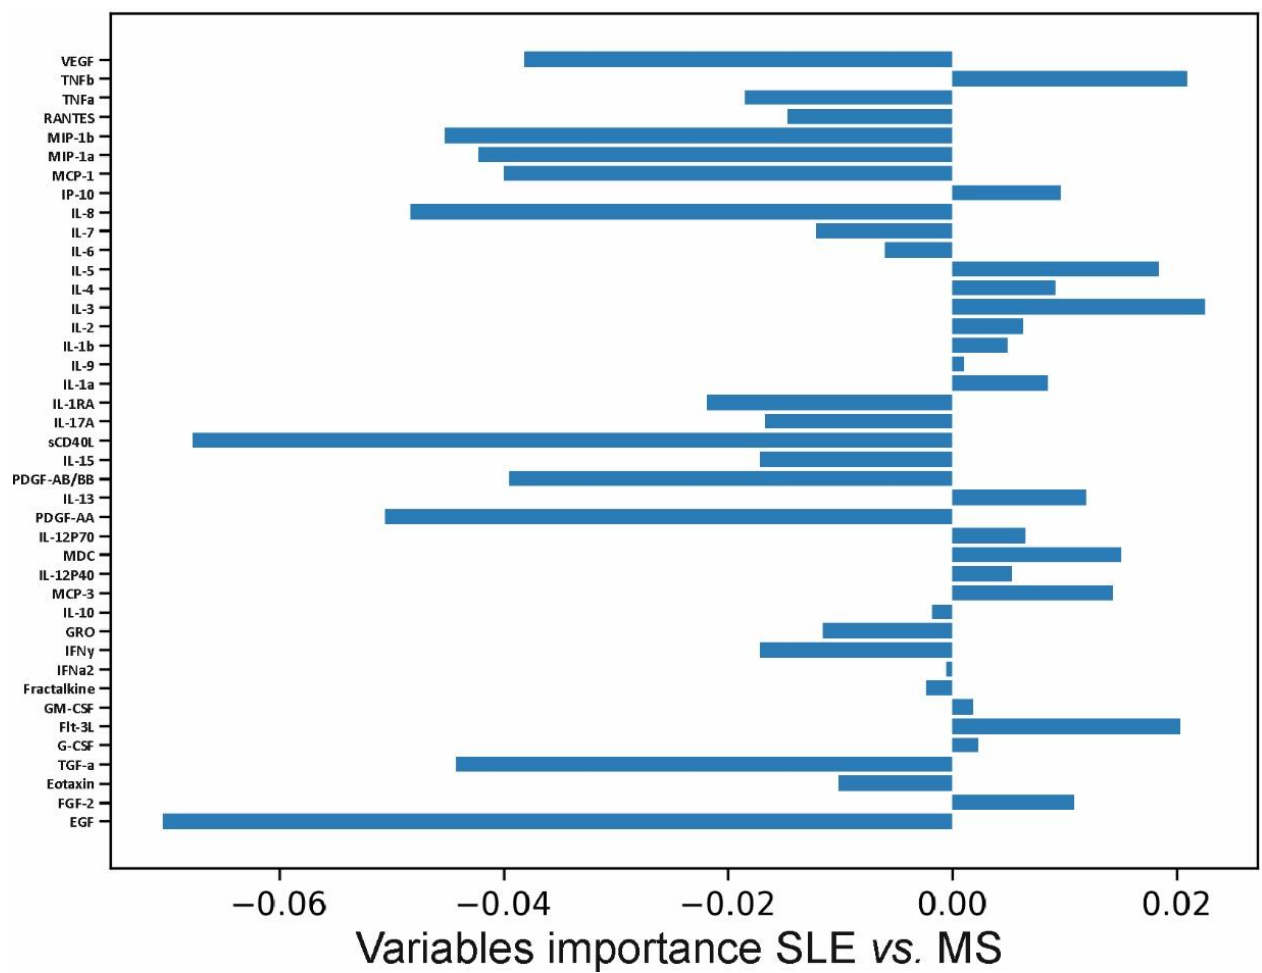

**Figure S6.** Variables importance in PLS-DA comparing SLE vs. MS groups.
