# Supplementary material for: Multiplex Analysis of Serum Cytokine Profiles in Systemic Lupus Erythematosus and Multiple Sclerosis
Source: Int J Mol Sci. 2022 Nov 10;23(22):13829. doi: 10.3390/ijms232213829 (PMC9695219; doi:10.3390/ijms232213829)
Supplement: Supplementary file 1 [file ijms-23-13829-s001.zip]

Archive with 8 entries (8 files):
- Supplement Figures.pdf
- Table S1.xlsx
- Table S2.xlsx
- Table S3.xlsx
- Table S4.xlsx
- Table S5.xlsx
- Table S6.xlsx
- Table S7.xlsx
