# Supplementary material for: Multiplex Analysis of Serum Cytokine Profiles in Systemic Lupus Erythematosus and Multiple Sclerosis
Source: Int J Mol Sci. 2022 Nov 10;23(22):13829. doi: 10.3390/ijms232213829 (PMC9695219; doi:10.3390/ijms232213829)
Supplement: Supplementary file 1 [file ijms-23-13829-s001.zip › Table S1.xlsx]

## Sheet: Лист1
Table S1. Immune-targeted pharmacotherapy of SLE patients.
Treatment	n	%	Median dosage
Steroids
Prednisolone	33	54.0984	20 mg/day
Methylprednisolone (tablet form)	30	49.1803	12 mg/day
Methylprednisolone (intravenous form)	10	16.3934	500 mg/day
Betamethasone dipropionate	3	4.91803	1 mg/day
Dexamethasone	2	3.27869	6 mg/day
Without any steroids	0	100	-
Other treatment
Hydroxychloroquine	51	83.6066	400 mg/day
Methotrexate	15	24.5902	15 mg/week
Mycophenolate mofetil	11	18.0328	1000 mg/day
Azathioprine	8	13.1148	100 mg/day
Filgrastim	2	3.27869	300 mg/day
Celecoxib	1	1.63934	8 mg/day
Tenoxicam	1	1.63934	20 mg/day
