# Supplementary material for: Multiplex Analysis of Serum Cytokine Profiles in Systemic Lupus Erythematosus and Multiple Sclerosis
Source: Int J Mol Sci. 2022 Nov 10;23(22):13829. doi: 10.3390/ijms232213829 (PMC9695219; doi:10.3390/ijms232213829)
Supplement: Supplementary file 1 [file ijms-23-13829-s001.zip › Table S2.xlsx]

## Sheet: Лист1
Table S2. Descriptive statistics of cytokine concentrations for the analyzed groups.
Analyte	Group	N	Min	Q1	Median	Q3	Max
EGF	SLE	60	8.05	48.405	101.245	136.205	1249
	MS	52	0.69	4.945	7.71	11.6375	42.36
	HS	36	8.05	93.6225	132.59	253.938	381.15
FGF-2	SLE	58	6.72	21.87	29.825	47.2225	293
	MS	49	13.02	18.59	23.32	37.59	145.45
	HS	32	9.87	17.8	25.085	44.65	178.98
Eotaxin	SLE	60	32.16	123.695	171.625	232.88	996.13
	MS	55	32.18	80.24	107.58	162.3	306.05
	HS	36	81.33	119.478	148.67	198.162	266.48
TGF-a	SLE	60	0.23	1.8125	3.105	4.8575	19.88
	MS	55	0.05	0.31	0.52	0.83	72.9
	HS	36	0.39	1.19	2.175	3.1625	13.26
G-CSF	SLE	57	0.33	16.26	30.92	57.93	344.9
	MS	46	1.06	7.29	17.28	32.2175	207.26
	HS	34	1.06	7.29	20.23	29.84	481.2
Flt-3L	SLE	48	0.64	4.975	15.03	26.235	2170
	MS	45	0.64	5.485	15.03	21.195	57.58
	HS	29	0.64	4.35	9.46	19.065	99.93
GM-CSF	SLE	57	0.08	2.1	4.75	13.245	424.3
	MS	53	0.01	1.49	2.95	4.75	21.26
	HS	29	0.33	0.815	2.42	3.83	106.47
Fractalkine	SLE	49	6.85	43.69	71.13	143.91	1369
	MS	48	3.67	32.07	54.65	75.165	332.79
	HS	29	3.67	15.96	32.07	65.61	792.98
IFNa2	SLE	39	2.8	7.37	18.23	32.9	301
	MS	39	2.8	6.65	10.51	22.18	67.59
	HS	25	0.84	6.65	12.46	22.01	182.66
IFNy	SLE	48	0.12	3.98	8.33	25.7075	490.05
	MS	40	0.12	1.95	3.26	5.385	29.45
	HS	26	0.12	2.5	6.39	11.58	118.09
GRO	SLE	60	206.85	760.278	1074.5	1780.5	7525
	MS	55	42.84	262.93	551.35	1307	7406
	HS	36	255.06	717.48	933.13	1470.25	2860
IL-10	SLE	58	0.15	1.66	2.605	7.0175	186.5
	MS	53	0.06	1.19	1.92	2.82	560.72
	HS	33	0.33	0.95	1.66	3.32	37.32
MCP-3	SLE	53	2.39	11.07	20.89	34.04	1252
	MS	50	2.39	9.78	16.59	31.975	101.64
	HS	31	2.39	7.61	13.97	19.04	151.61
IL-12P40	SLE	53	0.07	0.63	1.72	5.01	312
	MS	49	0.04	0.345	1.03	2.7	43.62
	HS	25	0.05	0.48	1.03	2.415	87.82
MDC	SLE	60	74.56	230.265	381.295	498.517	751.52
	MS	55	85.57	273.75	391.9	481.93	2223
	HS	36	118.73	399.033	510.185	645.605	1672
IL-12P70	SLE	60	0.09	0.61	1.67	2.78	349
	MS	54	0.03	0.4	0.96	1.8	10.42
	HS	35	0.05	0.61	1.13	2.09	133.21
PDGF-AA	SLE	60	234.46	1039	1635.5	2106.75	3918
	MS	55	59.09	225.09	523.75	930.45	2681
	HS	36	78.3	1727	2413	2732.25	4140
IL-13	SLE	53	0.07	0.475	1.59	4.71	251.29
	MS	48	0.11	0.435	0.945	2.905	55.07
	HS	29	0.16	0.445	1.1	4.855	76.79
PDGF-AB/BB	SLE	60	2321	7997	10191.5	13738.2	17791
	MS	55	388.46	2202	4074	7573	18527
	HS	36	189.54	7862.25	10138	12663.2	16227
IL-15	SLE	59	0.48	2.25	3.33	4.76	96.35
	MS	54	0.24	0.95	1.42	2.655	11.72
	HS	36	0.23	0.9025	1.53	2.155	17.65
sCD40L	SLE	59	76.99	568.22	788.36	1508	6605
	MS	53	3.71	25.54	45.12	108.085	365.4
	HS	36	18.4	1378.75	2201	3139	4114
IL-17A	SLE	50	0.12	0.53	1.42	4.16	53.31
	MS	45	0.04	0.3	0.72	1.19	31.25
	HS	31	0.05	0.44	1.3	1.77	24.97
IL-1RA	SLE	59	2.64	12.85	27.95	59.83	181
	MS	52	1.02	4.4	7.02	14.16	44.36
	HS	35	0.62	4.1	8.01	17.39	102.49
IL-1a	SLE	50	0.21	1.78	7.73	32.045	224
	MS	39	0.21	1.55	4.64	12.02	170.6
	HS	21	0.5	0.82	1.78	3.195	132.7
IL-9	SLE	38	0.36	0.87	2.03	9.995	117
	MS	43	0.13	0.58	1.32	2.17	20.7
	HS	23	0.07	0.36	0.58	1.55	41.02
IL-1b	SLE	60	0.1	0.55	1	1.615	198.41
	MS	55	0.11	0.36	0.63	0.85	4.33
	HS	36	0.15	0.3375	0.57	0.83	11.43
IL-2	SLE	52	0.1	0.37	0.635	1.4725	81.52
	MS	45	0.12	0.335	0.45	0.665	4.65
	HS	30	0.06	0.3275	0.47	0.65	15.61
IL-3	SLE	58	0.02	0.11	0.205	0.27	1.19
	MS	55	0.06	0.17	0.24	0.3	0.72
	HS	36	0.06	0.11	0.205	0.25	3.68
IL-4	SLE	58	1.94	24.52	44.215	97.0225	2243
	MS	54	1.94	13.22	29.08	65.0025	723.3
	HS	35	4.13	14.33	37.15	48.36	1304
IL-5	SLE	59	0.11	0.5	0.87	1.49	70.27
	MS	54	0.21	0.545	0.86	1.11	4.72
	HS	36	0.3	0.575	0.76	1.2	16.16
IL-6	SLE	59	0.06	0.54	1.71	5.53	300.61
	MS	53	0.02	0.14	0.4	1.545	47.92
	HS	30	0.03	0.1075	0.235	0.785	55.17
IL-7	SLE	59	0.79	1.91	4.17	7.56	138.62
	MS	49	0.09	1.42	1.9	2.72	33.96
	HS	35	0.05	1.75	2.7	3.87	96.21
IL-8	SLE	60	3.11	8.3025	12.195	21.7525	94.09
	MS	55	0.83	2.48	3.67	5.58	28.72
	HS	36	3.21	5.735	7.435	14.7825	55.19
IP-10	SLE	60	61.21	232.893	378.495	802.815	2152
	MS	55	99.33	289.54	381.44	526.42	1443
	HS	36	107.33	222.22	314.9	398.045	699.36
MCP-1	SLE	60	108.26	398.87	638.34	996.367	2249
	MS	55	77.62	156.68	225.44	330.27	662.56
	HS	36	92	264.132	348.39	502.03	1094
MIP-1a	SLE	57	0.81	3.25	5.92	13.345	28.86
	MS	32	0.01	0.835	1.57	3.7025	11.28
	HS	34	0.3	1.735	2.9	7.22	20.29
MIP-1b	SLE	60	6.45	27.6575	40.535	60.23	132.63
	MS	55	4.15	10.58	15.1	22.63	69.24
	HS	36	3.64	19.11	28.37	38.0675	66.64
RANTES	SLE	60	89.47	1631	1981	2846.25	5130
	MS	55	332.56	1289	1831	2316	4913
	HS	36	199.42	1271.25	1823	2366	3088
TNFa	SLE	60	0.97	7.3875	12.225	18.7925	189.76
	MS	55	1.05	3.8	5.59	7.95	22.34
	HS	36	0.83	3.6975	5.895	10.1475	35.35
TNFb	SLE	55	0.05	0.36	1.18	6	208.74
	MS	49	0.03	0.65	1.52	3.765	123.64
	HS	31	0.03	0.26	0.48	1.86	67.54
VEGF	SLE	56	8.39	38.8375	141.26	460.072	1901
	MS	49	1.46	8.28	17.86	53.96	276.87
	HS	35	2.71	30	68.19	127.79	1041
