# Supplementary material for: Multiplex Analysis of Serum Cytokine Profiles in Systemic Lupus Erythematosus and Multiple Sclerosis
Source: Int J Mol Sci. 2022 Nov 10;23(22):13829. doi: 10.3390/ijms232213829 (PMC9695219; doi:10.3390/ijms232213829)
Supplement: Supplementary file 1 [file ijms-23-13829-s001.zip › Table S3.xlsx]

## Sheet: Лист1
Table S3. Kruskal–Wallis ANOVA test results.
Analyte	Chi-Square	DF	P value*
EGF	96.4443	2	1.14126e-21
FGF-2	2.84887	2	0.24064
Eotaxin	17.5564	2	0.000154055
TGF-a	64.3433	2	1.06667e-14
G-CSF	11.8487	2	0.00267
Flt-3L	2.2713	2	0.32121
GM-CSF	9.1339	2	0.01039
Fractalkine	13.8463	2	0.000984714
IFNa2	3.70495	2	0.15685
IFNy	16.5758	2	0.00025154
GRO	16.2959	2	0.000289327
IL-10	12.8445	2	0.00163
MCP-3	4.26888	2	0.11831
IL-12P40	3.49396	2	0.1743
MDC	13.4203	2	0.00122
IL-12P70	4.90903	2	0.0859
PDGF-AA	70.2435	2	5.58245e-16
IL-13	1.7054	2	0.42626
PDGF-AB/BB	46.1836	2	9.36195e-11
IL-15	35.3777	2	2.0789e-08
sCD40L	102.61	2	5.23059e-23
IL-17A	10.4636	2	0.00534
IL-1RA	39.7555	2	2.32921e-09
IL-1a	6.77588	2	0.03378
IL-9	12.8802	2	0.0016
IL-1b	15.7743	2	0.000375546
IL-2	6.1971	2	0.04511
IL-3	5.73596	2	0.05681
IL-4	5.44274	2	0.06578
IL-5	0.77324	2	0.67935
IL-6	22.2628	2	1.46452e-05
IL-7	24.249	2	5.42503e-06
IL-8	69.4087	2	8.47404e-16
IP-10	5.48464	2	0.06442
MCP-1	50.9847	2	8.48815e-12
MIP-1a	29.1951	2	4.57465e-07
MIP-1b	53.0143	2	3.07669e-12
RANTES	5.31712	2	0.07005
TNFa	34.0503	2	4.03713e-08
TNFb	6.56434	2	0.03755
VEGF	42.9249	2	4.77499e-10
* P values < 0.05 are marked in red.
