# Supplementary material for: Multiplex Analysis of Serum Cytokine Profiles in Systemic Lupus Erythematosus and Multiple Sclerosis
Source: Int J Mol Sci. 2022 Nov 10;23(22):13829. doi: 10.3390/ijms232213829 (PMC9695219; doi:10.3390/ijms232213829)
Supplement: Supplementary file 1 [file ijms-23-13829-s001.zip › Table S4.xlsx]

## Sheet: Лист1
Table S4. Dunn's Test for multiple comparisons results.
Analyte	Compared groups	Mean Rank Difference	Z	P value	Significance*
EGF	SLE vs. MS	65.4788	8.06251	2.24223e-15	1
	SLE vs. HS	-15.6472	-1.73153	0.25007	0
	MS vs. HS	-81.1261	-8.72918	7.69609e-18	1
FGF-2	SLE vs. MS	12.7957	1.63901	0.30363	0
	SLE vs. HS	9.12769	1.03021	0.90874	0
	MS vs. HS	-3.66805	-0.40111	1	0
Eotaxin	SLE vs. MS	33.4182	4.09329	0.000127589	1
	SLE vs. HS	8.50556	0.92252	1	0
	MS vs. HS	-24.9126	-2.65713	0.02364	1
TGF-a	SLE vs. MS	63.0508	7.72342	3.39743e-14	1
	SLE vs. HS	12.0639	1.30855	0.57206	0
	MS vs. HS	-50.9869	-5.43853	1.61165e-07	1
G-CSF	SLE vs. MS	24.233	3.08393	0.00613	1
	SLE vs. HS	22.813	2.65544	0.02376	1
	MS vs. HS	-1.42008	-0.15837	1	0
Flt-3L	SLE vs. MS	1.97083	0.26866	1	0
	SLE vs. HS	12.1042	1.45572	0.43641	0
	MS vs. HS	10.1333	1.20368	0.68614	0
GM-CSF	SLE vs. MS	18.7617	2.4431	0.04368	1
	SLE vs. HS	23.9855	2.61292	0.02693	1
	MS vs. HS	5.22381	0.56196	1	0
Fractalkine	SLE vs. MS	17.6911	2.38768	0.05087	0
	SLE vs. HS	30.792	3.60227	0.000946346	1
	MS vs. HS	13.1009	1.52674	0.38048	0
IFNa2	SLE vs. MS	12.4744	1.8466	0.19442	0
	SLE vs. HS	9.96103	1.30333	0.57739	0
	MS vs. HS	-2.51333	-0.32885	1	0
IFNy	SLE vs. MS	28.7812	4.06887	0.000141726	1
	SLE vs. HS	12.0361	1.496	0.40396	0
	MS vs. HS	-16.7452	-2.01182	0.13272	0
GRO	SLE vs. MS	32.0015	3.91976	0.000265909	1
	SLE vs. HS	7.24444	0.78574	1	0
	MS vs. HS	-24.7571	-2.64054	0.02483	1
IL-10	SLE vs. MS	22.9475	2.89608	0.01134	1
	SLE vs. HS	28.4114	3.12485	0.00534	1
	MS vs. HS	5.46398	0.59094	1	0
MCP-3	SLE vs. MS	8.44132	1.10313	0.80992	0
	SLE vs. HS	17.9887	2.0497	0.12118	0
	MS vs. HS	9.54742	1.07602	0.84576	0
IL-12P40	SLE vs. MS	10.4222	1.4296	0.45849	0
	SLE vs. HS	14.8928	1.66862	0.28558	0
	MS vs. HS	4.47061	0.49447	1	0
MDC	SLE vs. MS	-2.48561	-0.30445	1	0
	SLE vs. HS	-31.6806	-3.4361	0.00177	1
	MS vs. HS	-29.1949	-3.11387	0.00554	1
IL-12P70	SLE vs. MS	17.8389	2.20538	0.08228	0
	SLE vs. HS	10.2238	1.1147	0.79494	0
	MS vs. HS	-7.61508	-0.81378	1	0
PDGF-AA	SLE vs. MS	46.9189	5.74694	2.72612e-08	1
	SLE vs. HS	-28.5139	-3.09263	0.00595	1
	MS vs. HS	-75.4328	-8.0455	2.57683e-15	1
IL-13	SLE vs. MS	9.63542	1.28409	0.59734	0
	SLE vs. HS	6.46552	0.74329	1	0
	MS vs. HS	-3.1699	-0.35789	1	0
PDGF-AB/BB	SLE vs. MS	51.6409	6.32532	7.58141e-10	1
	SLE vs. HS	3.94444	0.42782	1	0
	MS vs. HS	-47.6965	-5.0872	1.09019e-06	1
IL-15	SLE vs. MS	42.3835	5.21588	5.48845e-07	1
	SLE vs. HS	43.8604	4.80656	4.60645e-06	1
	MS vs. HS	1.47685	0.15908	1	0
sCD40L	SLE vs. MS	58.4944	7.21005	1.67794e-12	1
	SLE vs. HS	-30.7561	-3.39247	0.00208	1
	MS vs. HS	-89.2505	-9.63993	1.62671e-21	1
IL-17A	SLE vs. MS	24.18	3.22468	0.00378	1
	SLE vs. HS	9.52839	1.1422	0.76011	0
	MS vs. HS	-14.6516	-1.72015	0.25622	0
IL-1RA	SLE vs. MS	46.0416	5.7245	3.11219e-08	1
	SLE vs. HS	43.2341	4.7923	4.94635e-06	1
	MS vs. HS	-2.80742	-0.30367	1	0
IL-1a	SLE vs. MS	8.38051	1.23027	0.65578	0
	SLE vs. HS	21.4171	2.58307	0.02938	1
	MS vs. HS	13.0366	1.51057	0.39269	0
IL-9	SLE vs. MS	13.5181	2.01407	0.13201	0
	SLE vs. HS	28.3335	3.55769	0.00112	1
	MS vs. HS	14.8155	1.90247	0.17133	0
IL-1b	SLE vs. MS	28.9455	3.54703	0.00117	1
	SLE vs. HS	28.7611	3.12085	0.00541	1
	MS vs. HS	-0.18434	-0.01967	1	0
IL-2	SLE vs. MS	15.6449	2.09003	0.10984	0
	SLE vs. HS	17.6449	2.09331	0.10897	0
	MS vs. HS	2	0.23079	1	0
IL-3	SLE vs. MS	-17.5977	-2.16943	0.09015	0
	SLE vs. HS	-0.19588	-0.02142	1	0
	MS vs. HS	17.4018	1.88339	0.17894	0
IL-4	SLE vs. MS	16.1207	2.00277	0.13561	0
	SLE vs. HS	17.635	1.93565	0.15873	0
	MS vs. HS	1.51429	0.16394	1	0
IL-5	SLE vs. MS	7.08239	0.87203	1	0
	SLE vs. HS	4.3185	0.4735	1	0
	MS vs. HS	-2.76389	-0.29786	1	0
IL-6	SLE vs. MS	28.4664	3.65703	0.000765473	1
	SLE vs. HS	38.6799	4.1939	8.22607e-05	1
	MS vs. HS	10.2135	1.08686	0.83129	0
IL-7	SLE vs. MS	39.4019	4.92427	2.54029e-06	1
	SLE vs. HS	17.6877	2.00253	0.13568	0
	MS vs. HS	-21.7143	-2.37001	0.05336	0
IL-8	SLE vs. MS	67.4371	8.26021	4.36241e-16	1
	SLE vs. HS	23.1889	2.5151	0.0357	1
	MS vs. HS	-44.2482	-4.71946	7.09428e-06	1
IP-10	SLE vs. MS	-1.32879	-0.16276	1	0
	SLE vs. HS	18.8778	2.0475	0.12183	0
	MS vs. HS	20.2066	2.15519	0.09344	0
MCP-1	SLE vs. MS	58.2939	7.14022	2.79538e-12	1
	SLE vs. HS	28.2444	3.06341	0.00656	1
	MS vs. HS	-30.0495	-3.20501	0.00405	1
MIP-1a	SLE vs. MS	41.4496	5.26399	4.22888e-07	1
	SLE vs. HS	23.6628	3.06337	0.00657	1
	MS vs. HS	-17.7868	-2.0259	0.12833	0
MIP-1b	SLE vs. MS	59.4235	7.27862	1.01179e-12	1
	SLE vs. HS	26.8333	2.91037	0.01083	1
	MS vs. HS	-32.5902	-3.47601	0.00153	1
RANTES	SLE vs. MS	16.4455	2.01435	0.13192	0
	SLE vs. HS	17.2389	1.86974	0.18456	0
	MS vs. HS	0.79343	0.08463	1	0
TNFa	SLE vs. MS	44.8856	5.49827	1.1506e-07	1
	SLE vs. HS	37.7889	4.09889	0.00012454	1
	MS vs. HS	-7.09672	-0.75697	1	0
TNFb	SLE vs. MS	-3.55566	-0.46292	1	0
	SLE vs. HS	18.4868	2.10522	0.10582	0
	MS vs. HS	22.0425	2.4565	0.04209	1
VEGF	SLE vs. MS	51.4732	6.49088	2.56003e-10	1
	SLE vs. HS	16.9732	1.94311	0.15601	0
	MS vs. HS	-34.5	-3.84536	0.000361131	1
*A value of 1 indicates that the difference is significant at the 0.05 level. A value of 0 indicates that the difference is NOT significant at the 0.05 level.
