# Supplementary material for: Multiplex Analysis of Serum Cytokine Profiles in Systemic Lupus Erythematosus and Multiple Sclerosis
Source: Int J Mol Sci. 2022 Nov 10;23(22):13829. doi: 10.3390/ijms232213829 (PMC9695219; doi:10.3390/ijms232213829)
Supplement: Supplementary file 1 [file ijms-23-13829-s001.zip › Table S5.xlsx]

## Sheet: Лист1
Table S5. Correlation matrix for a group of healthy donors.
		EGF	FGF-2	Eotaxin	TGF-a	G-CSF	Flt-3L	GM-CSF	Fractalkine	IFNa2	IFNy	GRO	IL-10	MCP-3	IL-12P40	MDC	IL-12P70	PDGF-AA	IL-13	PDGF-AB/BB	IL-15	sCD40L	IL-17A	IL-1RA	IL-1a	IL-9	IL-1b	IL-2	IL-3	IL-4	IL-5	IL-6	IL-7	IL-8	IP-10	MCP-1	MIP-1a	MIP-1b	RANTES	TNFa	TNFb	VEGF	Age
"EGF"	Spearman Corr.	1	-0,15044	0,05354	0,42129*	0,34579*	0,32516	0,37215*	0,29467	-0,01465	0,27095	0,45431*	0,16718	0,09464	0,01731	0,32304	0,29696	0,10708	0,23416	0,52844*	0,24401	0,66486*	0,25278	0,37996*	-0,19681	0,31522	0,45663*	0,0214	-0,03287	-0,10435	0,20851	-0,00467	0,17003	0,4824*	0,11249	0,21776	0,69576*	0,13745	0,13874	0,42887*	-0,08815	0,31599	0,17451
	p-value	--	0,41117	0,75647	0,0105	0,04516	0,08523	0,04681	0,12073	0,94458	0,18062	0,00538	0,35241	0,61255	0,93453	0,05464	0,08321	0,53421	0,22147	9,23109E-4	0,15152	9,73465E-6	0,17007	0,02436	0,39251	0,1429	0,00512	0,91061	0,84907	0,55081	0,22233	0,98044	0,32881	0,00289	0,51362	0,20202	4,92152E-6	0,42405	0,41968	0,00906	0,63725	0,06443	0,30869
"FGF-2"	Spearman Corr.	-0,15044	1	0,03917	0,30654	-0,07028	-0,06146	-0,11637	0,24666	-0,00723	0,31817	-0,01324	0,10075	0,2354	0,57806*	-0,32938	0,02575	-0,33711	0,04574	0,09343	0,37807*	-0,29131	0,25316	0,10912	0,20062	0,2558	-0,31338	0,50103*	0,67714*	0,52594*	-0,26167	0,39645*	0,44003*	0,18144	-0,13279	-0,33012	-0,17969	-0,22179	0,01857	0,0218	0,44362*	0,20997	-0,00194
	p-value	0,41117	--	0,83144	0,08793	0,71209	0,76074	0,56326	0,20574	0,97327	0,12973	0,94266	0,5963	0,2372	0,00386	0,06564	0,89063	0,0592	0,82077	0,61104	0,03288	0,10574	0,19366	0,55899	0,42473	0,25056	0,08072	0,00661	2,08007E-5	0,00237	0,14798	0,04063	0,01173	0,3203	0,46874	0,065	0,34205	0,22246	0,91963	0,90573	0,01593	0,25691	0,99161
"Eotaxin"	Spearman Corr.	0,05354	0,03917	1	-0,02278	0,05247	-0,09713	-0,2403	-0,29393	0,11452	-0,03216	0,14775	-0,07741	-0,27323	0,13043	0,24633	-0,05513	0,15573	-0,33153	0,15779	-0,0648	0,14801	0,13769	-0,11881	-0,24177	-0,33359	0,01224	-0,2223	0,00967	-0,14432	-0,0683	-0,10351	0,16583	-0,09769	-0,14003	0,09421	-0,13298	0,21004	0,22806	0,16351	-0,01594	0,12889	0,08577
	p-value	0,75647	0,83144	--	0,89507	0,76823	0,61621	0,20926	0,12171	0,5857	0,87607	0,38983	0,66854	0,13695	0,5343	0,14755	0,75312	0,36444	0,07894	0,35805	0,7073	0,38899	0,4601	0,49665	0,29103	0,11982	0,9435	0,23773	0,95537	0,40816	0,69226	0,58623	0,34109	0,57084	0,41531	0,58471	0,45343	0,21887	0,18098	0,34065	0,93219	0,46056	0,61891
"TGF-a"	Spearman Corr.	0,42129*	0,30654	-0,02278	1	0,23391	0,23792	0,00875	0,16909	0,13517	0,25667	0,34638*	-0,05192	0,21294	0,15778	-0,03501	0,19564	0,11893	0,04315	0,51448*	0,1197	0,35616*	0,34346	0,44896*	0,07301	0,26614	0,28364	0,47692*	0,08051	0,00168	-0,08867	-0,06969	0,21401	0,32149	-0,15202	0,00386	0,35754*	-0,16296	0,13863	-0,01989	-0,15777	0,36015*	-0,04134
	p-value	0,0105	0,08793	0,89507	--	0,18304	0,21394	0,96406	0,38055	0,51943	0,2056	0,0385	0,77416	0,2501	0,45129	0,83936	0,26004	0,48964	0,82413	0,00133	0,48683	0,03301	0,05853	0,00682	0,75313	0,21965	0,09366	0,00771	0,64067	0,99234	0,60707	0,71443	0,21703	0,05588	0,37609	0,98217	0,0379	0,34232	0,42006	0,90831	0,39662	0,03357	0,81079
"G-CSF"	Spearman Corr.	0,34579*	-0,07028	0,05247	0,23391	1	0,16391	0,36467	0,18676	0,20394	7,71756E-4	0,19391	0,38761*	0,22748	0,1368	0,09159	0,06728	0,37279*	0,38845*	0,26509	0,29914	0,19284	-0,15434	0,42964*	0,25303	0,49016*	0,25186	0,19016	0,1419	0,07579	0,27873	0,2383	0,09187	0,26534	0,38762*	0,09665	0,20376	-0,07318	-0,1281	0,27742	0,19207	0,3166	0,38116*
	p-value	0,04516	0,71209	0,76823	0,18304	--	0,41397	0,06146	0,3413	0,33913	0,99708	0,27183	0,0312	0,23531	0,52385	0,60645	0,70987	0,0299	0,04107	0,12972	0,08568	0,27454	0,42408	0,01258	0,28177	0,02409	0,15073	0,32313	0,4234	0,67509	0,11043	0,22203	0,61111	0,12935	0,02351	0,58661	0,26333	0,68086	0,47031	0,11218	0,3182	0,07264	0,02614
"Flt-3L"	Spearman Corr.	0,32516	-0,06146	-0,09713	0,23792	0,16391	1	0,08012	0,45815*	-0,13229	0,10492	0,03747	0,18765	-0,22955	0,026	0,07765	0,22527	0,16344	-0,10966	0,11858	0,38384*	0,37988*	0,022	0,35331	-0,19099	-0,05541	0,3633	0,37064	0,01888	0,17987	-0,11073	-0,1296	0,14915	0,34258	-0,17577	0,14495	0,56938*	0,19672	-0,15802	0,26033	-0,08751	0,16722	-0,10103
	p-value	0,08523	0,76074	0,61621	0,21394	0,41397	--	0,70341	0,02436	0,55728	0,64216	0,84698	0,34861	0,26967	0,91336	0,68887	0,24909	0,39691	0,60999	0,54012	0,03982	0,04209	0,91685	0,06009	0,44775	0,80651	0,05273	0,0746	0,92255	0,35972	0,56745	0,53695	0,44	0,06888	0,36175	0,45311	0,00194	0,30639	0,41297	0,1726	0,67076	0,38592	0,60206
"GM-CSF"	Spearman Corr.	0,37215*	-0,11637	-0,2403	0,00875	0,36467	0,08012	1	0,52519*	0,32051	0,20794	-0,0419	0,54287*	0,62473*	0,42625	-0,15675	0,49513*	0,03993	0,49913*	0,13407	0,22844	0,27653	0,37165	0,52527*	0,60726*	0,81325*	0,57236*	0,13715	0,05211	0,26996	0,44705*	0,66725*	0,39147*	0,0175	0,22011	0,01183	0,33233	-0,30413	-0,12865	0,25354	0,38651	0,21229	0,05656
	p-value	0,04681	0,56326	0,20926	0,96406	0,06146	0,70341	--	0,00702	0,15662	0,36573	0,82915	0,00343	0,0011	0,05401	0,41678	0,00739	0,83708	0,01532	0,48807	0,23329	0,14647	0,07375	0,0041	0,00752	2,29911E-5	0,00118	0,52279	0,78834	0,16474	0,01504	3,68561E-4	0,03573	0,9282	0,25124	0,95143	0,08402	0,10871	0,50598	0,18447	0,05112	0,27813	0,77071
"Fractalkine"	Spearman Corr.	0,29467	0,24666	-0,29393	0,16909	0,18676	0,45815*	0,52519*	1	0,10827	0,636*	-0,18041	0,58068*	0,19324	0,47266*	-0,19028	0,53063*	-0,09477	0,46329*	-0,09033	0,39367*	0,01037	0,29369	0,37617*	0,50886*	0,63508*	0,52557*	0,36487	0,25204	0,23229	0,08279	0,47939*	0,17715	0,24522	-0,00679	-0,05454	0,33553	-0,04985	-0,25617	0,07765	0,54182*	0,36066	-0,09745
	p-value	0,12073	0,20574	0,12171	0,38055	0,3413	0,02436	0,00702	--	0,62291	0,00111	0,34902	0,00149	0,36562	0,03048	0,32282	0,00367	0,62484	0,02599	0,64123	0,03461	0,95744	0,15419	0,04851	0,04412	0,00348	0,00341	0,06684	0,18717	0,22529	0,66942	0,01777	0,35794	0,1998	0,97212	0,77871	0,08709	0,79732	0,17981	0,68887	0,00425	0,05937	0,61503
"IFNa2"	Spearman Corr.	-0,01465	-0,00723	0,11452	0,13517	0,20394	-0,13229	0,32051	0,10827	1	0,02653	-0,40679*	0,10031	0,28735	0,32019	-0,14459	0,20358	0,20976	0,062	-0,01697	0,14609	-0,00424	0,09974	-0,12134	0,39116	0,0772	0,14319	0,29133	0,14655	-0,31868	0,03285	0,1395	9,65252E-4	-0,2555	-0,07982	-0,02661	0,23544	0,12261	-0,1176	0,00424	-0,07031	-0,00109	-0,33997
	p-value	0,94458	0,97327	0,5857	0,51943	0,33913	0,55728	0,15662	0,62291	--	0,90435	0,04359	0,64097	0,20659	0,1952	0,49045	0,34001	0,31425	0,77867	0,93585	0,48593	0,98395	0,65875	0,56343	0,16667	0,76075	0,49472	0,16722	0,48453	0,12908	0,87612	0,53582	0,99635	0,2177	0,7045	0,89954	0,27949	0,55929	0,57558	0,98394	0,75585	0,99595	0,09636
"IFNy"	Spearman Corr.	0,27095	0,31817	-0,03216	0,25667	7,71756E-4	0,10492	0,20794	0,636*	0,02653	1	0,05679	0,11972	0,23859	0,2135	-0,08827	0,67715*	-0,15771	0,5602*	0,01163	0,37316	0,04858	0,62864*	0,36407	0,57918*	0,50885*	0,49495*	0,2883	0,25729	0,20919	0,23582	0,3754	0,33208	0,2645	-0,02121	0,16011	0,24521	-0,02566	-0,0284	0,32203	0,46066*	0,33648	-0,00994
	p-value	0,18062	0,12973	0,87607	0,2056	0,99708	0,64216	0,36573	0,00111	0,90435	--	0,78289	0,57738	0,29762	0,41064	0,66809	2,0098E-4	0,44161	0,00543	0,95503	0,06043	0,81369	0,00173	0,07359	0,02997	0,03104	0,01015	0,17187	0,20449	0,3156	0,24615	0,07753	0,09744	0,19163	0,91808	0,43462	0,24813	0,90098	0,89048	0,10863	0,03559	0,09281	0,96158
"GRO"	Spearman Corr.	0,45431*	-0,01324	0,14775	0,34638*	0,19391	0,03747	-0,0419	-0,18041	-0,40679*	0,05679	1	0,05868	-0,09868	-0,34436	0,25251	0,12035	-0,00669	0,07838	0,46075*	0,15086	0,44736*	-0,01292	0,19447	-0,21636	0,19856	0,13391	-0,20468	-0,05517	-0,07041	0,09111	-0,32877	0,25259	0,31534	0,13965	0,19434	0,19809	-0,01828	0,20412	0,31363	-0,24085	0,35203*	0,47311*
	p-value	0,00538	0,94266	0,38983	0,0385	0,27183	0,84698	0,82915	0,34902	0,04359	0,78289	--	0,74565	0,59741	0,09186	0,13734	0,49103	0,9691	0,68609	0,00469	0,37979	0,00623	0,945	0,26296	0,3462	0,36374	0,43621	0,27792	0,74929	0,68775	0,59718	0,07608	0,14321	0,06102	0,41661	0,25606	0,26143	0,91575	0,23243	0,0625	0,19183	0,03809	0,00357
"IL-10"	Spearman Corr.	0,16718	0,10075	-0,07741	-0,05192	0,38761*	0,18765	0,54287*	0,58068*	0,10031	0,11972	0,05868	1	0,234	0,28677	-0,14963	0,39541*	0,16568	0,53479*	-0,09028	0,4451*	0,21332	0,01947	0,32597	0,38265	0,50423*	0,35323*	0,07136	0,07047	0,38257*	0,33735	0,27502	0,20839	0,01438	0,07607	-0,1065	0,18051	0,05835	-0,13157	0,13889	0,24726	0,15565	0,18283
	p-value	0,35241	0,5963	0,66854	0,77416	0,0312	0,34861	0,00343	0,00149	0,64097	0,57738	0,74565	--	0,22181	0,17426	0,40592	0,02275	0,35682	0,00337	0,61733	0,00944	0,23327	0,92166	0,06866	0,10589	0,01415	0,04375	0,71299	0,69675	0,0307	0,05487	0,14876	0,2524	0,9367	0,67392	0,55528	0,33118	0,74705	0,46547	0,44079	0,19596	0,39497	0,30849
"MCP-3"	Spearman Corr.	0,09464	0,2354	-0,27323	0,21294	0,22748	-0,22955	0,62473*	0,19324	0,28735	0,23859	-0,09868	0,234	1	0,23057	-0,2581	0,22674	-0,08132	0,39224	-0,05166	0,17523	-0,0565	0,28307	0,35988*	0,61383*	0,4584*	0,37779*	0,38938	0,15045	0,25036	0,38739*	0,71189*	0,35948	0,20099	0,0995	-0,32368	0,2365	-0,24781	-0,14307	0,12821	0,42121*	0,22588	-0,00566
	p-value	0,61255	0,2372	0,13695	0,2501	0,23531	0,26967	0,0011	0,36562	0,20659	0,29762	0,59741	0,22181	--	0,30191	0,16096	0,21998	0,66363	0,05799	0,78255	0,34573	0,76272	0,1444	0,04675	0,00518	0,04208	0,03614	0,05436	0,41917	0,18208	0,03131	4,53204E-5	0,05105	0,27828	0,59436	0,07569	0,21677	0,17892	0,44259	0,49188	0,02866	0,23006	0,97589
"IL-12P40"	Spearman Corr.	0,01731	0,57806*	0,13043	0,15778	0,1368	0,026	0,42625	0,47266*	0,32019	0,2135	-0,34436	0,28677	0,23057	1	-0,37861	0,22149	0,00346	0,24309	0,12928	0,29784	-0,13351	0,32943	0,22171	0,34199	0,50629*	0,11902	0,58779*	0,61318*	0,54428*	-0,00887	0,53299*	0,36593	-0,13238	-0,06541	-0,08465	0,17986	-0,19738	-0,02155	0,14877	0,62402*	0,32441	-0,10944
	p-value	0,93453	0,00386	0,5343	0,45129	0,52385	0,91336	0,05401	0,03048	0,1952	0,41064	0,09186	0,17426	0,30191	--	0,062	0,2873	0,98689	0,28832	0,53796	0,14817	0,52462	0,14477	0,28682	0,21216	0,04538	0,57095	0,00642	0,00112	0,00491	0,96643	0,01285	0,07865	0,52816	0,75608	0,68747	0,41153	0,34428	0,91857	0,47788	0,00112	0,12196	0,60253
"MDC"	Spearman Corr.	0,32304	-0,32938	0,24633	-0,03501	0,09159	0,07765	-0,15675	-0,19028	-0,14459	-0,08827	0,25251	-0,14963	-0,2581	-0,37861	1	-0,06607	-0,07336	-0,21765	0,19562	-0,11183	0,32844	0,10438	0,01779	-0,38254	-0,38968	0,01173	-0,46332*	-0,39366*	-0,25891	0,01688	-0,22415	-0,24502	0,01828	0,3349*	0,38893*	0,16217	0,38507*	-0,1166	0,37312*	-0,33949	-0,09579	0,34851*
	p-value	0,05464	0,06564	0,14755	0,83936	0,60645	0,68887	0,41678	0,32282	0,49045	0,66809	0,13734	0,40592	0,16096	0,062	--	0,70611	0,6707	0,25672	0,25287	0,51613	0,05049	0,57629	0,91919	0,087	0,06605	0,94587	0,00992	0,01753	0,13314	0,92215	0,23374	0,156	0,91574	0,04587	0,01906	0,3595	0,02039	0,49825	0,025	0,0617	0,58411	0,03724
"IL-12P70"	Spearman Corr.	0,29696	0,02575	-0,05513	0,19564	0,06728	0,22527	0,49513*	0,53063*	0,20358	0,67715*	0,12035	0,39541*	0,22674	0,22149	-0,06607	1	0,09749	0,5397*	0,19652	0,2987	0,26469	0,71835*	0,2874	0,47339*	0,45534*	0,5569*	0,19246	-0,01573	0,11654	0,1935	0,21424	0,4629*	0,0108	-0,10409	0,30159	0,46014*	0,1421	0,12835	0,43198*	0,17978	0,22981	0,08255
	p-value	0,08321	0,89063	0,75312	0,26004	0,70987	0,24909	0,00739	0,00367	0,34001	2,0098E-4	0,49103	0,02275	0,21998	0,2873	0,70611	--	0,57743	0,00304	0,25785	0,08133	0,12438	7,81547E-6	0,09933	0,03501	0,02901	5,11544E-4	0,3172	0,92854	0,51158	0,26539	0,26442	0,00584	0,95089	0,55181	0,0783	0,00705	0,41549	0,46246	0,00956	0,34179	0,19106	0,63733
"PDGF-AA"	Spearman Corr.	0,10708	-0,33711	0,15573	0,11893	0,37279*	0,16344	0,03993	-0,09477	0,20976	-0,15771	-0,00669	0,16568	-0,08132	0,00346	-0,07336	0,09749	1	0,07444	0,14414	0,27429	0,33179*	-0,18272	-0,00518	0,12317	-0,06701	0,11239	0,0379	-0,05916	-0,20533	0,0192	-0,11375	0,05299	-0,10593	-0,06345	0,23707	0,20191	0,21853	0,31892	0,07841	-0,19708	0,20743	-0,04605
	p-value	0,53421	0,0592	0,36444	0,48964	0,0299	0,39691	0,83708	0,62484	0,31425	0,44161	0,9691	0,35682	0,66363	0,98689	0,6707	0,57743	--	0,70115	0,40162	0,10548	0,04806	0,3252	0,97642	0,5948	0,76127	0,51402	0,84237	0,73178	0,23669	0,9115	0,54952	0,76243	0,53864	0,71313	0,16388	0,25215	0,20038	0,05798	0,64943	0,28794	0,23182	0,78972
"IL-13"	Spearman Corr.	0,23416	0,04574	-0,33153	0,04315	0,38845*	-0,10966	0,49913*	0,46329*	0,062	0,5602*	0,07838	0,53479*	0,39224	0,24309	-0,21765	0,5397*	0,07444	1	0,04141	0,35373	0,06458	0,16551	0,1355	0,78261*	0,78551*	0,43614*	0,1504	0,33506	0,36341	0,58667*	0,34446	0,32771	0,29163	0,2354	-0,14025	0,28744	-0,1617	0,02933	0,07657	0,49452*	0,25195	0,17569
	p-value	0,22147	0,82077	0,07894	0,82413	0,04107	0,60999	0,01532	0,02599	0,77867	0,00543	0,68609	0,00337	0,05799	0,28832	0,25672	0,00304	0,70115	--	0,83111	0,05977	0,73927	0,4396	0,49178	3,38671E-4	2,45283E-5	0,01802	0,46333	0,07561	0,05732	8,22912E-4	0,08485	0,08868	0,12479	0,21898	0,46805	0,14601	0,40204	0,87994	0,69299	0,01023	0,19587	0,36198
"PDGF-AB/BB"	Spearman Corr.	0,52844*	0,09343	0,15779	0,51448*	0,26509	0,11858	0,13407	-0,09033	-0,01697	0,01163	0,46075*	-0,09028	-0,05166	0,12928	0,19562	0,19652	0,14414	0,04141	1	0,13463	0,44247*	0,23925	0,21296	-0,29782	0,15686	0,22529	0,06511	-0,00812	-0,0641	0,03286	-0,07991	0,23998	0,24339	0,00837	0,16911	0,39236*	-0,14569	0,26538	0,29136	-0,1535	0,22104	0,0899
	p-value	9,23109E-4	0,61104	0,35805	0,00133	0,12972	0,54012	0,48807	0,64123	0,93585	0,95503	0,00469	0,61733	0,78255	0,53796	0,25287	0,25785	0,40162	0,83111	--	0,43372	0,00689	0,19488	0,21934	0,18979	0,47474	0,18648	0,73249	0,96251	0,71452	0,84911	0,67466	0,16497	0,1526	0,96138	0,32414	0,02172	0,39654	0,11775	0,08469	0,40968	0,20194	0,60207
"IL-15"	Spearman Corr.	0,24401	0,37807*	-0,0648	0,1197	0,29914	0,38384*	0,22844	0,39367*	0,14609	0,37316	0,15086	0,4451*	0,17523	0,29784	-0,11183	0,2987	0,27429	0,35373	0,13463	1	0,29413	0,08561	0,19819	0,48043*	0,26667	0,21952	0,29685	0,44213*	0,2438	0,1817	0,33668	0,44756*	0,18534	0,27179	0,17972	0,30809	0,18874	3,86499E-4	0,37286*	0,25669	0,26613	0,26934
	p-value	0,15152	0,03288	0,7073	0,48683	0,08568	0,03982	0,23329	0,03461	0,48593	0,06043	0,37979	0,00944	0,34573	0,14817	0,51613	0,08133	0,10548	0,05977	0,43372	--	0,08165	0,64703	0,25375	0,02749	0,2187	0,19831	0,11117	0,00694	0,15813	0,28889	0,06888	0,00702	0,27917	0,10882	0,29425	0,07629	0,27028	0,99822	0,02511	0,16334	0,12228	0,11218
"sCD40L"	Spearman Corr.	0,66486*	-0,29131	0,14801	0,35616*	0,19284	0,37988*	0,27653	0,01037	-0,00424	0,04858	0,44736*	0,21332	-0,0565	-0,13351	0,32844	0,26469	0,33179*	0,06458	0,44247*	0,29413	1	0,0109	0,31454	-0,02085	0,06553	0,41114*	-0,05061	-0,24465	-0,17574	0,36366*	-0,08859	0,26689	0,28457	-0,08958	0,42831*	0,56293*	0,27387	0,20824	0,21617	-0,28341	0,26634	0,09957
	p-value	9,73465E-6	0,10574	0,38899	0,03301	0,27454	0,04209	0,14647	0,95744	0,98395	0,81369	0,00623	0,23327	0,76272	0,52462	0,05049	0,12438	0,04806	0,73927	0,00689	0,08165	--	0,95358	0,06573	0,92851	0,76643	0,01274	0,79054	0,15042	0,31259	0,02924	0,64155	0,12117	0,09254	0,60337	0,00916	5,28469E-4	0,10602	0,22294	0,20541	0,12235	0,12197	0,5634
"IL-17A"	Spearman Corr.	0,25278	0,25316	0,13769	0,34346	-0,15434	0,022	0,37165	0,29369	0,09974	0,62864*	-0,01292	0,01947	0,28307	0,32943	0,10438	0,71835*	-0,18272	0,16551	0,23925	0,08561	0,0109	1	0,32236	0,47222	0,19584	0,3299	0,12552	0,01577	0,21185	0,00718	0,31561	0,2778	0,11427	-0,00485	0,1811	0,35604	0,03836	0,30769	0,41485*	0,18401	0,1599	0,1284
	p-value	0,17007	0,19366	0,4601	0,05853	0,42408	0,91685	0,07375	0,15419	0,65875	0,00173	0,945	0,92166	0,1444	0,14477	0,57629	7,81547E-6	0,3252	0,4396	0,19488	0,64703	0,95358	--	0,07696	0,05562	0,40797	0,06992	0,54123	0,93288	0,26108	0,96943	0,12433	0,13719	0,54046	0,97936	0,32956	0,05801	0,83767	0,0922	0,02031	0,3582	0,39865	0,49121
"IL-1RA"	Spearman Corr.	0,37996*	0,10912	-0,11881	0,44896*	0,42964*	0,35331	0,52527*	0,37617*	-0,12134	0,36407	0,19447	0,32597	0,35988*	0,22171	0,01779	0,2874	-0,00518	0,1355	0,21296	0,19819	0,31454	0,32236	1	0,44423*	0,37919	0,39935*	0,2721	-0,06335	0,29277	0,20105	0,49803*	0,19697	0,26173	-0,04021	0,09205	0,25238	-0,16841	-0,10676	0,37599*	0,17275	0,48006*	0,07815
	p-value	0,02436	0,55899	0,49665	0,00682	0,01258	0,06009	0,0041	0,04851	0,56343	0,07359	0,26296	0,06866	0,04675	0,28682	0,91919	0,09933	0,97642	0,49178	0,21934	0,25375	0,06573	0,07696	--	0,04365	0,07435	0,01747	0,15331	0,7177	0,0929	0,24682	0,00597	0,26419	0,12881	0,81859	0,59895	0,15649	0,33352	0,54159	0,02601	0,35271	0,00406	0,65541
"IL-1a"	Spearman Corr.	-0,19681	0,20062	-0,24177	0,07301	0,25303	-0,19099	0,60726*	0,50886*	0,39116	0,57918*	-0,21636	0,38265	0,61383*	0,34199	-0,38254	0,47339*	0,12317	0,78261*	-0,29782	0,48043*	-0,02085	0,47222	0,44423*	1	0,83912*	0,25865	0,302	0,28141	0,52694*	0,53475*	0,73151*	0,33366	0,0163	0,14472	0,02737	-0,03816	-0,12186	0,1362	0,01402	0,63877*	0,39511	-0,01806
	p-value	0,39251	0,42473	0,29103	0,75313	0,28177	0,44775	0,00752	0,04412	0,16667	0,02997	0,3462	0,10589	0,00518	0,21216	0,087	0,03501	0,5948	3,38671E-4	0,18979	0,02749	0,92851	0,05562	0,04365	--	3,35353E-4	0,25758	0,25562	0,21653	0,01411	0,0125	5,60621E-4	0,13937	0,9441	0,53139	0,90625	0,87311	0,59873	0,55607	0,95189	0,00324	0,07628	0,93806
"IL-9"	Spearman Corr.	0,31522	0,2558	-0,33359	0,26614	0,49016*	-0,05541	0,81325*	0,63508*	0,0772	0,50885*	0,19856	0,50423*	0,4584*	0,50629*	-0,38968	0,45534*	-0,06701	0,78551*	0,15686	0,26667	0,06553	0,19584	0,37919	0,83912*	1	0,66642*	0,47309*	0,34187	0,44849*	0,44992*	0,58673*	0,45229*	0,33963	0,34202	-0,03922	0,2183	-0,43187*	-0,23877	0,11398	0,65894*	0,40587	0,17813
	p-value	0,1429	0,25056	0,11982	0,21965	0,02409	0,80651	2,29911E-5	0,00348	0,76075	0,03104	0,36374	0,01415	0,04208	0,04538	0,06605	0,02901	0,76127	2,45283E-5	0,47474	0,2187	0,76643	0,40797	0,07435	3,35353E-4	--	5,16437E-4	0,03514	0,11035	0,0363	0,03123	0,00654	0,03024	0,11285	0,11017	0,859	0,34177	0,0396	0,27255	0,60457	0,00116	0,05466	0,41613
"IL-1b"	Spearman Corr.	0,45663*	-0,31338	0,01224	0,28364	0,25186	0,3633	0,57236*	0,52557*	0,14319	0,49495*	0,13391	0,35323*	0,37779*	0,11902	0,01173	0,5569*	0,11239	0,43614*	0,22529	0,21952	0,41114*	0,3299	0,39935*	0,25865	0,66642*	1	0,19685	-0,07242	0,07473	0,49051*	0,19208	0,39562*	0,19102	-0,03854	0,17786	0,50452*	0,05117	-0,07411	0,16265	0,22691	0,31038	-0,10475
	p-value	0,00512	0,08072	0,9435	0,09366	0,15073	0,05273	0,00118	0,00341	0,49472	0,01015	0,43621	0,04375	0,03614	0,57095	0,94587	5,11544E-4	0,51402	0,01802	0,18648	0,19831	0,01274	0,06992	0,01747	0,25758	5,16437E-4	--	0,29711	0,6747	0,66964	0,00239	0,3092	0,01865	0,26444	0,82342	0,29937	0,00234	0,76696	0,66753	0,34324	0,21962	0,06958	0,54318
"IL-2"	Spearman Corr.	0,0214	0,50103*	-0,2223	0,47692*	0,19016	0,37064	0,13715	0,36487	0,29133	0,2883	-0,20468	0,07136	0,38938	0,58779*	-0,46332*	0,19246	0,0379	0,1504	0,06511	0,29685	-0,05061	0,12552	0,2721	0,302	0,47309*	0,19685	1	0,44148*	0,27662	-0,01139	0,26518	0,36299	0,22221	-0,19222	-0,19309	0,30895	-0,14158	-0,22408	0,02599	0,32836	0,04725	-0,26036
	p-value	0,91061	0,00661	0,23773	0,00771	0,32313	0,0746	0,52279	0,06684	0,16722	0,17187	0,27792	0,71299	0,05436	0,00642	0,00992	0,3172	0,84237	0,46333	0,73249	0,11117	0,79054	0,54123	0,15331	0,25562	0,03514	0,29711	--	0,01459	0,14633	0,95236	0,19045	0,05295	0,23792	0,30886	0,30663	0,10967	0,45548	0,23389	0,89157	0,10147	0,80771	0,16466
"IL-3"	Spearman Corr.	-0,03287	0,67714*	0,00967	0,08051	0,1419	0,01888	0,05211	0,25204	0,14655	0,25729	-0,05517	0,07047	0,15045	0,61318*	-0,39366*	-0,01573	-0,05916	0,33506	-0,00812	0,44213*	-0,24465	0,01577	-0,06335	0,28141	0,34187	-0,07242	0,44148*	1	0,34883*	-0,02594	0,29622	0,45226*	0,26297	0,02005	-0,22338	-0,00988	0,03803	0,02797	0,05345	0,5859*	0,23804	-0,12234
	p-value	0,84907	2,08007E-5	0,95537	0,64067	0,4234	0,92255	0,78834	0,18717	0,48453	0,20449	0,74929	0,69675	0,41917	0,00112	0,01753	0,92854	0,73178	0,07561	0,96251	0,00694	0,15042	0,93288	0,7177	0,21653	0,11035	0,6747	0,01459	--	0,04	0,88062	0,11196	0,00638	0,12125	0,90762	0,19033	0,95579	0,82573	0,87136	0,75687	5,33907E-4	0,16851	0,47722
"IL-4"	Spearman Corr.	-0,10435	0,52594*	-0,14432	0,00168	0,07579	0,17987	0,26996	0,23229	-0,31868	0,20919	-0,07041	0,38257*	0,25036	0,54428*	-0,25891	0,11654	-0,20533	0,36341	-0,0641	0,2438	-0,17574	0,21185	0,29277	0,52694*	0,44849*	0,07473	0,27662	0,34883*	1	0,12548	0,45953*	0,2893	0,16046	0,00309	-0,25666	0,1441	-0,28696	-0,00519	0,05107	0,4903*	-0,04496	0,02636
	p-value	0,55081	0,00237	0,40816	0,99234	0,67509	0,35972	0,16474	0,22529	0,12908	0,3156	0,68775	0,0307	0,18208	0,00491	0,13314	0,51158	0,23669	0,05732	0,71452	0,15813	0,31259	0,26108	0,0929	0,01411	0,0363	0,66964	0,14633	0,04	--	0,4726	0,01215	0,09701	0,35715	0,98596	0,13666	0,42367	0,09465	0,9764	0,77077	0,00511	0,80067	0,88053
"IL-5"	Spearman Corr.	0,20851	-0,26167	-0,0683	-0,08867	0,27873	-0,11073	0,44705*	0,08279	0,03285	0,23582	0,09111	0,33735	0,38739*	-0,00887	0,01688	0,1935	0,0192	0,58667*	0,03286	0,1817	0,36366*	0,00718	0,20105	0,53475*	0,44992*	0,49051*	-0,01139	-0,02594	0,12548	1	0,17321	0,04666	0,24563	0,05587	0,09884	0,33844	0,17397	0,13595	0,05202	0,16929	0,15327	0,1028
	p-value	0,22233	0,14798	0,69226	0,60707	0,11043	0,56745	0,01504	0,66942	0,87612	0,24615	0,59718	0,05487	0,03131	0,96643	0,92215	0,26539	0,9115	8,22912E-4	0,84911	0,28889	0,02924	0,96943	0,24682	0,0125	0,03123	0,00239	0,95236	0,88062	0,4726	--	0,36002	0,7901	0,14873	0,74622	0,56629	0,05025	0,31023	0,42917	0,76319	0,36259	0,37939	0,55075
"IL-6"	Spearman Corr.	-0,00467	0,39645*	-0,10351	-0,06969	0,2383	-0,1296	0,66725*	0,47939*	0,1395	0,3754	-0,32877	0,27502	0,71189*	0,53299*	-0,22415	0,21424	-0,11375	0,34446	-0,07991	0,33668	-0,08859	0,31561	0,49803*	0,73151*	0,58673*	0,19208	0,26518	0,29622	0,45953*	0,17321	1	0,40276*	0,12634	0,13934	-0,05498	0,0826	-0,36171*	-0,26266	0,35731	0,77327*	0,22509	-0,08956
	p-value	0,98044	0,04063	0,58623	0,71443	0,22203	0,53695	3,68561E-4	0,01777	0,53582	0,07753	0,07608	0,14876	4,53204E-5	0,01285	0,23374	0,26442	0,54952	0,08485	0,67466	0,06888	0,64155	0,12433	0,00597	5,60621E-4	0,00654	0,3092	0,19045	0,11196	0,01215	0,36002	--	0,03029	0,5059	0,46272	0,77292	0,67603	0,04952	0,16083	0,05257	3,62845E-6	0,24042	0,63789
"IL-7"	Spearman Corr.	0,17003	0,44003*	0,16583	0,21401	0,09187	0,14915	0,39147*	0,17715	9,65252E-4	0,33208	0,25259	0,20839	0,35948	0,36593	-0,24502	0,4629*	0,05299	0,32771	0,23998	0,44756*	0,26689	0,2778	0,19697	0,33366	0,45229*	0,39562*	0,36299	0,45226*	0,2893	0,04666	0,40276*	1	0,1064	-0,00813	0,05831	0,09412	-0,17564	0,00617	0,22997	0,48819*	0,35766*	-0,00379
	p-value	0,32881	0,01173	0,34109	0,21703	0,61111	0,44	0,03573	0,35794	0,99635	0,09744	0,14321	0,2524	0,05105	0,07865	0,156	0,00584	0,76243	0,08868	0,16497	0,00702	0,12117	0,13719	0,26419	0,13937	0,03024	0,01865	0,05295	0,00638	0,09701	0,7901	0,03029	--	0,54296	0,96303	0,73933	0,60238	0,31287	0,97195	0,18386	0,0062	0,03783	0,98274
"IL-8"	Spearman Corr.	0,4824*	0,18144	-0,09769	0,32149	0,26534	0,34258	0,0175	0,24522	-0,2555	0,2645	0,31534	0,01438	0,20099	-0,13238	0,01828	0,0108	-0,10593	0,29163	0,24339	0,18534	0,28457	0,11427	0,26173	0,0163	0,33963	0,19102	0,22221	0,26297	0,16046	0,24563	0,12634	0,1064	1	-0,1412	-0,15406	0,6016*	-0,00618	0,24146	0,11562	0,24057	0,30577	0,06604
	p-value	0,00289	0,3203	0,57084	0,05588	0,12935	0,06888	0,9282	0,1998	0,2177	0,19163	0,06102	0,9367	0,27828	0,52816	0,91574	0,95089	0,53864	0,12479	0,1526	0,27917	0,09254	0,54046	0,12881	0,9441	0,11285	0,26444	0,23792	0,12125	0,35715	0,14873	0,5059	0,54296	--	0,4114	0,36965	1,6761E-4	0,97147	0,15599	0,50189	0,19236	0,07405	0,70195
"IP-10"	Spearman Corr.	0,11249	-0,13279	-0,14003	-0,15202	0,38762*	-0,17577	0,22011	-0,00679	-0,07982	-0,02121	0,13965	0,07607	0,0995	-0,06541	0,3349*	-0,10409	-0,06345	0,2354	0,00837	0,27179	-0,08958	-0,00485	-0,04021	0,14472	0,34202	-0,03854	-0,19222	0,02005	0,00309	0,05587	0,13934	-0,00813	-0,1412	1	0,27428	-0,09936	0,01107	-0,38818*	0,30052	0,07878	-0,09271	0,6416*
	p-value	0,51362	0,46874	0,41531	0,37609	0,02351	0,36175	0,25124	0,97212	0,7045	0,91808	0,41661	0,67392	0,59436	0,75608	0,04587	0,55181	0,71313	0,21898	0,96138	0,10882	0,60337	0,97936	0,81859	0,53139	0,11017	0,82342	0,30886	0,90762	0,98596	0,74622	0,46272	0,96303	0,4114	--	0,10549	0,57612	0,94891	0,01931	0,07493	0,67358	0,5963	2,4755E-5
"MCP-1"	Spearman Corr.	0,21776	-0,33012	0,09421	0,00386	0,09665	0,14495	0,01183	-0,05454	-0,02661	0,16011	0,19434	-0,1065	-0,32368	-0,08465	0,38893*	0,30159	0,23707	-0,14025	0,16911	0,17972	0,42831*	0,1811	0,09205	0,02737	-0,03922	0,17786	-0,19309	-0,22338	-0,25666	0,09884	-0,05498	0,05831	-0,15406	0,27428	1	0,11846	0,51094*	0,08983	0,40942*	-0,17126	0,1317	0,2252
	p-value	0,20202	0,065	0,58471	0,98217	0,58661	0,45311	0,95143	0,77871	0,89954	0,43462	0,25606	0,55528	0,07569	0,68747	0,01906	0,0783	0,16388	0,46805	0,32414	0,29425	0,00916	0,32956	0,59895	0,90625	0,859	0,29937	0,30663	0,19033	0,13666	0,56629	0,77292	0,73933	0,36965	0,10549	--	0,50462	0,00145	0,60235	0,01315	0,35697	0,45077	0,18664
"MIP-1a"	Spearman Corr.	0,69576*	-0,17969	-0,13298	0,35754*	0,20376	0,56938*	0,33233	0,33553	0,23544	0,24521	0,19809	0,18051	0,2365	0,17986	0,16217	0,46014*	0,20191	0,28744	0,39236*	0,30809	0,56293*	0,35604	0,25238	-0,03816	0,2183	0,50452*	0,30895	-0,00988	0,1441	0,33844	0,0826	0,09412	0,6016*	-0,09936	0,11846	1	0,22453	0,2146	0,39472*	0,03073	0,0396	0,00582
	p-value	4,92152E-6	0,34205	0,45343	0,0379	0,26333	0,00194	0,08402	0,08709	0,27949	0,24813	0,26143	0,33118	0,21677	0,41153	0,3595	0,00705	0,25215	0,14601	0,02172	0,07629	5,28469E-4	0,05801	0,15649	0,87311	0,34177	0,00234	0,10967	0,95579	0,42367	0,05025	0,67603	0,60238	1,6761E-4	0,57612	0,50462	--	0,20173	0,22294	0,02088	0,87191	0,8268	0,97393
"MIP-1b"	Spearman Corr.	0,13745	-0,22179	0,21004	-0,16296	-0,07318	0,19672	-0,30413	-0,04985	0,12261	-0,02566	-0,01828	0,05835	-0,24781	-0,19738	0,38507*	0,1421	0,21853	-0,1617	-0,14569	0,18874	0,27387	0,03836	-0,16841	-0,12186	-0,43187*	0,05117	-0,14158	0,03803	-0,28696	0,17397	-0,36171*	-0,17564	-0,00618	0,01107	0,51094*	0,22453	1	0,12329	0,25789	-0,26404	0,03492	-0,0169
	p-value	0,42405	0,22246	0,21887	0,34232	0,68086	0,30639	0,10871	0,79732	0,55929	0,90098	0,91575	0,74705	0,17892	0,34428	0,02039	0,41549	0,20038	0,40204	0,39654	0,27028	0,10602	0,83767	0,33352	0,59873	0,0396	0,76696	0,45548	0,82573	0,09465	0,31023	0,04952	0,31287	0,97147	0,94891	0,00145	0,20173	--	0,47374	0,12888	0,15119	0,84213	0,92208
"RANTES"	Spearman Corr.	0,13874	0,01857	0,22806	0,13863	-0,1281	-0,15802	-0,12865	-0,25617	-0,1176	-0,0284	0,20412	-0,13157	-0,14307	-0,02155	-0,1166	0,12835	0,31892	0,02933	0,26538	3,86499E-4	0,20824	0,30769	-0,10676	0,1362	-0,23877	-0,07411	-0,22408	0,02797	-0,00519	0,13595	-0,26266	0,00617	0,24146	-0,38818*	0,08983	0,2146	0,12329	1	-0,12875	-0,09864	0,12174	0,04256
	p-value	0,41968	0,91963	0,18098	0,42006	0,47031	0,41297	0,50598	0,17981	0,57558	0,89048	0,23243	0,46547	0,44259	0,91857	0,49825	0,46246	0,05798	0,87994	0,11775	0,99822	0,22294	0,0922	0,54159	0,55607	0,27255	0,66753	0,23389	0,87136	0,9764	0,42917	0,16083	0,97195	0,15599	0,01931	0,60235	0,22294	0,47374	--	0,45424	0,59756	0,48602	0,80531
"TNFa"	Spearman Corr.	0,42887*	0,0218	0,16351	-0,01989	0,27742	0,26033	0,25354	0,07765	0,00424	0,32203	0,31363	0,13889	0,12821	0,14877	0,37312*	0,43198*	0,07841	0,07657	0,29136	0,37286*	0,21617	0,41485*	0,37599*	0,01402	0,11398	0,16265	0,02599	0,05345	0,05107	0,05202	0,35731	0,22997	0,11562	0,30052	0,40942*	0,39472*	0,25789	-0,12875	1	0,07738	0,25207	0,37058*
	p-value	0,00906	0,90573	0,34065	0,90831	0,11218	0,1726	0,18447	0,68887	0,98394	0,10863	0,0625	0,44079	0,49188	0,47788	0,025	0,00956	0,64943	0,69299	0,08469	0,02511	0,20541	0,02031	0,02601	0,95189	0,60457	0,34324	0,89157	0,75687	0,77077	0,76319	0,05257	0,18386	0,50189	0,07493	0,01315	0,02088	0,12888	0,45424	--	0,67905	0,14407	0,02609
"TNFb"	Spearman Corr.	-0,08815	0,44362*	-0,01594	-0,15777	0,19207	-0,08751	0,38651	0,54182*	-0,07031	0,46066*	-0,24085	0,24726	0,42121*	0,62402*	-0,33949	0,17978	-0,19708	0,49452*	-0,1535	0,25669	-0,28341	0,18401	0,17275	0,63877*	0,65894*	0,22691	0,32836	0,5859*	0,4903*	0,16929	0,77327*	0,48819*	0,24057	0,07878	-0,17126	0,03073	-0,26404	-0,09864	0,07738	1	0,21199	-0,12614
	p-value	0,63725	0,01593	0,93219	0,39662	0,3182	0,67076	0,05112	0,00425	0,75585	0,03559	0,19183	0,19596	0,02866	0,00112	0,0617	0,34179	0,28794	0,01023	0,40968	0,16334	0,12235	0,3582	0,35271	0,00324	0,00116	0,21962	0,10147	5,33907E-4	0,00511	0,36259	3,62845E-6	0,0062	0,19236	0,67358	0,35697	0,87191	0,15119	0,59756	0,67905	--	0,26074	0,49894
"VEGF"	Spearman Corr.	0,31599	0,20997	0,12889	0,36015*	0,3166	0,16722	0,21229	0,36066	-0,00109	0,33648	0,35203*	0,15565	0,22588	0,32441	-0,09579	0,22981	0,20743	0,25195	0,22104	0,26613	0,26634	0,1599	0,48006*	0,39511	0,40587	0,31038	0,04725	0,23804	-0,04496	0,15327	0,22509	0,35766*	0,30577	-0,09271	0,1317	0,0396	0,03492	0,12174	0,25207	0,21199	1	0,04836
	p-value	0,06443	0,25691	0,46056	0,03357	0,07264	0,38592	0,27813	0,05937	0,99595	0,09281	0,03809	0,39497	0,23006	0,12196	0,58411	0,19106	0,23182	0,19587	0,20194	0,12228	0,12197	0,39865	0,00406	0,07628	0,05466	0,06958	0,80771	0,16851	0,80067	0,37939	0,24042	0,03783	0,07405	0,5963	0,45077	0,8268	0,84213	0,48602	0,14407	0,26074	--	0,78264
"Age"	Spearman Corr.	0,17451	-0,00194	0,08577	-0,04134	0,38116*	-0,10103	0,05656	-0,09745	-0,33997	-0,00994	0,47311*	0,18283	-0,00566	-0,10944	0,34851*	0,08255	-0,04605	0,17569	0,0899	0,26934	0,09957	0,1284	0,07815	-0,01806	0,17813	-0,10475	-0,26036	-0,12234	0,02636	0,1028	-0,08956	-0,00379	0,06604	0,6416*	0,2252	0,00582	-0,0169	0,04256	0,37058*	-0,12614	0,04836	1
	p-value	0,30869	0,99161	0,61891	0,81079	0,02614	0,60206	0,77071	0,61503	0,09636	0,96158	0,00357	0,30849	0,97589	0,60253	0,03724	0,63733	0,78972	0,36198	0,60207	0,11218	0,5634	0,49121	0,65541	0,93806	0,41613	0,54318	0,16466	0,47722	0,88053	0,55075	0,63789	0,98274	0,70195	2,4755E-5	0,18664	0,97393	0,92208	0,80531	0,02609	0,49894	0,78264	--
2-tailed test of significance is used
*: Correlation is significant at the 0.05 level
