# Supplementary material for: Multiplex Analysis of Serum Cytokine Profiles in Systemic Lupus Erythematosus and Multiple Sclerosis
Source: Int J Mol Sci. 2022 Nov 10;23(22):13829. doi: 10.3390/ijms232213829 (PMC9695219; doi:10.3390/ijms232213829)
Supplement: Supplementary file 1 [file ijms-23-13829-s001.zip › Table S6.xlsx]

## Sheet: Лист1
Table S6. Correlation matrix for a group of SLE patients.
		EGF	FGF-2	Eotaxin	TGF-a	G-CSF	Flt-3L	GM-CSF	Fractalkine	IFNa2	IFNy	GRO	IL-10	MCP-3	IL-12P40	MDC	IL-12P70	PDGF-AA	IL-13	PDGF-AB/BB	IL-15	sCD40L	IL-17A	IL-1RA	IL-1a	IL-9	IL-1b	IL-2	IL-3	IL-4	IL-5	IL-6	IL-7	IL-8	IP-10	MCP-1	MIP-1a	MIP-1b	RANTES	TNFa	TNFb	VEGF	"BMI"	"Total cholesterol, mMol/L"	"Atherogenic index"	"HDL"	"LDL"	SELENA-SLEDAI
"EGF"	Spearman Corr.	1	-0.21698	0.23351	0,35015*	0,09757	0,08274	0,15257	0,10559	0,14022	-0,17459	0,33565*	-0,037	-0,005	-0,16473	0,28558*	0,03757	0,22606	0,04344	0,2888*	-0,09204	0,50006*	0,10422	0,15858	0,12148	0,06448	0,21417	0,0355	-0,0977	0,14026	0,06863	-0,02066	0,07207	0,07694	0,12048	0,10086	-0,00613	0,00636	0,16308	0,22516	-0,07604	0,09115	-0,18132	0,08586	0,08098	-0,1282	-0,03922	0,15861
	p-value	--	0,10182	0,07255	0,0061	0,47028	0,57612	0,25721	0,47026	0,39456	0,23528	0,00875	0,78275	0,97165	0,23849	0,02698	0,77566	0,08242	0,75744	0,02523	0,4881	5,51439E-5	0,47135	0,23028	0,40071	0,70054	0,10034	0,80268	0,46563	0,29367	0,60554	0,87655	0,58753	0,55902	0,35918	0,44321	0,96393	0,96152	0,21315	0,08368	0,58111	0,50408	0,27595	0,59833	0,61939	0,43048	0,81009	0,26139
"FGF-2"	Spearman Corr.	-0,21698	1	-0,03457	0,36361*	0,25657	0,23248	0,22934	0,33356*	0,36194*	0,4728*	-0,02072	0,19181	0,46713*	0,50759*	-0,00289	0,15757	-0,22348	0,36377*	0,0366	0,0773	-0,04174	0,17953	0,20322	0,43109*	0,43639*	0,24205	0,54645*	0,43205*	0,30261*	0,20636	0,40296*	0,39707*	0,13203	-0,02937	0,06113	0,07088	-0,2245	-0,19191	-0,02524	0,34285*	0,18877	-0,09612	-0,11523	-0,07016	-0,09659	-0,19108	0,24077
	p-value	0,10182	--	0,79671	0,00502	0,05864	0,11583	0,08908	0,02051	0,02356	7,90905E-4	0,87733	0,15291	5,48784E-4	1,43628E-4	0,9828	0,2375	0,09174	0,00869	0,78504	0,56763	0,75787	0,2221	0,12948	0,00199	0,00616	0,06717	2,77969E-5	8,84051E-4	0,0234	0,12354	0,00188	0,00223	0,32319	0,82679	0,64849	0,60709	0,09023	0,14896	0,8508	0,01115	0,17161	0,57146	0,48483	0,67127	0,55857	0,24393	0,08877
"Eotaxin"	Spearman Corr.	0,23351	-0,03457	1	0,26358*	-0,04442	0,00985	0,14242	0,16286	0,09301	0,05771	0,2882*	-0,13127	-0,03152	0,03118	0,26052*	0,04081	0,14057	0,07042	0,3172*	0,25551	0,32715*	-0,02465	0,11641	-6,72463E-4	-0,09754	0,03516	-0,08799	-0,04058	0,03945	-0,01627	-0,02642	-0,01336	0,24541	-0,00256	0,3688*	0,17541	0,21027	0,17794	0,05046	-0,09286	0,12643	-0,07436	0,17563	0,06812	0,08954	0,08544	-0,0458
	p-value	0,07255	0,79671	--	0,04186	0,74284	0,947	0,29059	0,26354	0,57332	0,69683	0,02555	0,326	0,82274	0,82459	0,04439	0,75688	0,28405	0,61631	0,01353	0,0508	0,01143	0,86507	0,37993	0,9963	0,56019	0,78971	0,53505	0,76232	0,76875	0,90264	0,84254	0,92	0,05876	0,98453	0,00374	0,19184	0,10683	0,17376	0,70179	0,50012	0,35314	0,65727	0,27836	0,67618	0,5827	0,60012	0,74713
"TGF-a"	Spearman Corr.	0,35015*	0,36361*	0,26358*	1	0,23675	0,31469*	0,36816*	0,27904	0,24935	0,28832*	0,25809*	0,0221	0,30489*	0,25771	0,31158*	0,1727	0,06619	0,24364	0,23805	0,03455	0,2475	0,22881	0,40615*	0,5206*	0,41123*	0,43957*	0,50103*	0,05132	0,39278*	0,22126	0,24157	0,28788*	0,10479	0,01331	0,20532	0,12768	-0,0698	0,04906	-0,02155	0,15844	0,02448	-0,00503	0,0891	-0,12968	0,19677	-0,06025	-0,06003
	p-value	0,0061	0,00502	0,04186	--	0,0762	0,02937	0,00484	0,05218	0,12581	0,04688	0,04648	0,86919	0,02643	0,06246	0,01538	0,187	0,61534	0,07875	0,06701	0,79503	0,05876	0,10997	0,00141	1,06365E-4	0,01032	4,41471E-4	1,54852E-4	0,70204	0,00229	0,09216	0,06529	0,02704	0,42556	0,9196	0,11554	0,34391	0,59614	0,70971	0,87017	0,24794	0,85786	0,97607	0,58454	0,42514	0,22362	0,71191	0,67247
"G-CSF"	Spearman Corr.	0,09757	0,25657	-0,04442	0,23675	1	0,29671*	0,3758*	0,203	0,39768*	0,46912*	0,2659*	0,31074*	0,25727	0,33618*	-0,14527	0,40817*	-0,01184	0,32344*	-0,06055	0,22431	0,1861	0,26074	0,41703*	0,30654*	0,35652*	0,39255*	0,49092*	0,00293	0,2142	0,11193	0,29248*	0,5433*	0,11097	0,24121	0,28355*	0,09035	0,08268	0,13961	0,27497*	0,05703	0,45878*	-0,25996	-0,03829	-0,05439	-0,12088	-0,09476	0,14177
	p-value	0,47028	0,05864	0,74284	0,0762	--	0,0478	0,0051	0,17116	0,01479	0,00101	0,04559	0,02094	0,07128	0,01699	0,28096	0,00162	0,93032	0,02195	0,65459	0,09651	0,16966	0,0767	0,00139	0,03408	0,03031	0,00253	3,41766E-4	0,98306	0,11633	0,41148	0,02871	1,5135E-5	0,4112	0,07068	0,03256	0,51183	0,54093	0,30033	0,03845	0,68503	5,50228E-4	0,13152	0,822	0,74916	0,47604	0,57694	0,33121
"Flt-3L"	Spearman Corr.	0,08274	0,23248	0,00985	0,31469*	0,29671*	1	0,13793	0,35294*	0,18773	0,17324	0,16281	0,30229*	0,25809	0,24885	-0,04023	0,23962	-0,11384	0,05928	-0,00114	0,36326*	0,06425	0,03642	0,42065*	0,33533*	0,2364	0,3048*	0,19615	-0,2283	0,10991	0,19723	0,25388	0,3244*	-0,00369	0,2734	0,30022*	0,21535	0,28	0,18418	0,29119*	0,13013	0,3791*	-0,06419	0,04785	-0,02473	0,03006	-0,03335	0,10319
	p-value	0,57612	0,11583	0,947	0,02937	0,0478	--	0,36623	0,02361	0,29548	0,28504	0,26887	0,03891	0,09074	0,10334	0,78603	0,10092	0,44103	0,7023	0,99386	0,01208	0,66789	0,82345	0,00324	0,02994	0,18534	0,03516	0,20191	0,12272	0,46208	0,1839	0,08164	0,0261	0,98013	0,06008	0,03815	0,15062	0,05391	0,21015	0,04464	0,40556	0,01022	0,72266	0,78487	0,88784	0,86388	0,84914	0,51551
"GM-CSF"	Spearman Corr.	0,15257	0,22934	0,14242	0,36816*	0,3758*	0,13793	1	0,47395*	0,55252*	0,33296*	0,01913	0,02104	0,54952*	0,43841*	0,10863	0,49379*	-0,01174	0,59479*	-0,01281	0,29723*	0,08356	0,22738	0,59045*	0,26912	0,44319*	0,48758*	0,48157*	0,02167	0,2869*	0,55633*	0,43224*	0,48648*	0,16381	0,32028*	0,41549*	0,0522	-0,08502	-0,06521	0,18057	0,33701*	0,31545*	-0,16665	0,03303	0,10921	-0,25441	0,0688	0,09751
	p-value	0,25721	0,08908	0,29059	0,00484	0,0051	0,36623	--	7,64697E-4	2,65174E-4	0,02376	0,88767	0,87881	3,57898E-5	0,00129	0,42119	9,48957E-5	0,93094	4,17098E-6	0,92466	0,0261	0,53657	0,12013	1,669E-6	0,06736	0,00601	1,19638E-4	3,99134E-4	0,87521	0,0337	8,5078E-6	8,78839E-4	1,4381E-4	0,22339	0,01515	0,00131	0,70776	0,52945	0,62985	0,1789	0,0136	0,0214	0,33135	0,84393	0,51395	0,12322	0,68149	0,5005
"Fractalkine"	Spearman Corr.	0,10559	0,33356*	0,16286	0,27904	0,203	0,35294*	0,47395*	1	0,51913*	0,11297	0,06625	0,08698	0,50981*	0,371*	0,14697	0,4937*	-0,27554	0,47393*	-0,01997	0,17669	0,12592	-0,01876	0,41754*	0,20719	0,21437	0,26867	0,39895*	0,12812	0,46474*	0,38054*	0,35023*	0,36576*	0,2972*	0,09987	0,13072	0,23837	-0,01001	0,02365	0,25093	0,28789	0,16677	-0,14679	0,04025	0,1498	-0,19098	-0,04628	0,21845
	p-value	0,47026	0,02051	0,26354	0,05218	0,17116	0,02361	7,64697E-4	--	0,00166	0,47627	0,65105	0,56102	4,08004E-4	0,01432	0,3136	3,12402E-4	0,05533	0,00133	0,89165	0,2296	0,39377	0,90732	0,00284	0,19956	0,23873	0,06196	0,00731	0,39077	8,75164E-4	0,00763	0,01467	0,01057	0,0381	0,49477	0,37064	0,09908	0,94556	0,87185	0,08201	0,05236	0,26798	0,43069	0,824	0,40536	0,28705	0,79815	0,17003
"IFNa2"	Spearman Corr.	0,14022	0,36194*	0,09301	0,24935	0,39768*	0,18773	0,55252*	0,51913*	1	0,34134*	0,08753	0,31189	0,53334*	0,50538*	-0,16088	0,65014*	-0,22785	0,39891*	0,00253	0,36*	0,008	0,01655	0,37736*	0,21404	0,45769*	0,47094*	0,49313*	0,24213	0,46545*	0,5331*	0,46311*	0,24493	0,3937*	0,06069	0,25115	0,16116	0,05821	-0,32288*	0,33678*	0,31578	0,26243	-0,2137	0,07011	-0,02332	-0,0558	0,10032	0,45619*
	p-value	0,39456	0,02356	0,57332	0,12581	0,01479	0,29548	2,65174E-4	0,00166	--	0,03868	0,59619	0,05325	8,09789E-4	0,00167	0,32787	7,48119E-6	0,163	0,01761	0,98779	0,02641	0,96143	0,92483	0,01951	0,23946	0,00844	0,00248	0,00224	0,14302	0,00323	4,75509E-4	0,00299	0,13288	0,01315	0,71363	0,12301	0,33373	0,72486	0,04498	0,03604	0,05692	0,11661	0,28449	0,71779	0,90444	0,77372	0,6046	0,00517
"IFNy"	Spearman Corr.	-0,17459	0,4728*	0,05771	0,28832*	0,46912*	0,17324	0,33296*	0,11297	0,34134*	1	0,22443	0,37238*	0,17085	0,27519	-0,16439	0,43319*	-0,21694	0,25632	0,1164	0,25487	-0,0626	0,43212*	0,43099*	0,27078	0,30797	0,29385*	0,50803*	0,09472	0,14469	0,22321	0,39344*	0,52217*	0,30163*	0,26916	0,32899*	0,36788*	0,08963	-0,15928	0,33126*	0,04207	0,34491*	-0,16215	-0,24868	-0,001	-0,24636	-0,26384	0,20673
	p-value	0,23528	7,90905E-4	0,69683	0,04688	0,00101	0,28504	0,02376	0,47627	0,03868	--	0,12514	0,00915	0,27935	0,07409	0,26421	0,0021	0,13859	0,10574	0,43079	0,08382	0,67255	0,00601	0,00249	0,09103	0,07189	0,04264	4,30832E-4	0,53123	0,33737	0,13153	0,00567	1,66807E-4	0,03721	0,06432	0,02242	0,01096	0,54461	0,27953	0,02145	0,78629	0,02032	0,38349	0,16286	0,99558	0,16695	0,13791	0,1947
"GRO"	Spearman Corr.	0,33565*	-0,02072	0,2882*	0,25809*	0,2659*	0,16281	0,01913	0,06625	0,08753	0,22443	1	0,11568	-0,05456	-0,20551	0,16821	0,06218	0,26352*	-0,05122	0,32265*	-0,12063	0,44483*	-0,08068	0,21847	0,07272	-0,13169	0,19968	-0,00555	-0,19383	0,28891*	0,07389	-0,1023	0,31917*	0,12226	0,12487	0,23362	0,20293	0,27269*	0,13673	0,2547*	-0,15746	0,08161	0,04826	-0,03913	0,21731	-0,37841*	-0,0092	0,04066
	p-value	0,00875	0,87733	0,02555	0,04648	0,04559	0,26887	0,88767	0,65105	0,59619	0,12514	--	0,38721	0,69799	0,13986	0,19888	0,63696	0,04191	0,71567	0,01193	0,36279	4,15759E-4	0,57756	0,09645	0,61575	0,43062	0,12611	0,96883	0,14487	0,02784	0,5781	0,44072	0,01374	0,35207	0,34181	0,07242	0,13005	0,03504	0,29752	0,04954	0,25094	0,54989	0,77357	0,81054	0,17799	0,01605	0,95509	0,77471
"IL-10"	Spearman Corr.	-0,037	0,19181	-0,13127	0,0221	0,31074*	0,30229*	0,02104	0,08698	0,31189	0,37238*	0,11568	1	0,11746	0,21059	-0,32055*	0,32427*	0,03432	0,1564	0,12805	0,28684*	-0,1927	0,12928	0,41142*	0,4112*	0,15051	0,271*	0,29983*	0,10411	0,12223	0,22352	0,35307*	0,31952*	0,23234	0,21402	0,32502*	0,21081	0,3102*	0,14221	0,39058*	0,159	0,20998	-0,04286	-0,28234	-0,0707	-0,11721	-0,20661	0,35833*
	p-value	0,78275	0,15291	0,326	0,86919	0,02094	0,03891	0,87881	0,56102	0,05325	0,00915	0,38721	--	0,4117	0,13799	0,01416	0,01302	0,79813	0,27308	0,3381	0,03052	0,15096	0,38117	0,00148	0,00333	0,36707	0,03962	0,03255	0,44512	0,36948	0,09465	0,00706	0,0154	0,07925	0,1067	0,0128	0,12236	0,0178	0,28692	0,00244	0,25546	0,12752	0,80114	0,0816	0,66886	0,47732	0,20696	0,00983
"MCP-3"	Spearman Corr.	-0,005	0,46713*	-0,03152	0,30489*	0,25727	0,25809	0,54952*	0,50981*	0,53334*	0,17085	-0,05456	0,11746	1	0,48903*	0,04553	0,30991*	-0,15679	0,73993*	1,61307E-4	0,21461	-0,08403	0,24553	0,40399*	0,64336*	0,83627*	0,4807*	0,32453*	0,20462	0,70231*	0,703*	0,66588*	0,30266*	0,2203	0,0071	0,0567	9,05244E-4	-0,18528	-0,02508	-0,05497	0,74311*	0,23326	-0,06535	0,20394	0,2	-0,22549	0,21246	-0,06991
	p-value	0,97165	5,48784E-4	0,82274	0,02643	0,07128	0,09074	3,57898E-5	4,08004E-4	8,09789E-4	0,27935	0,69799	0,4117	--	4,20305E-4	0,74615	0,02393	0,26221	2,80385E-9	0,99909	0,12656	0,55366	0,10817	0,00298	2,47451E-6	3,98206E-10	2,69235E-4	0,02604	0,14976	9,27778E-9	4,38751E-9	7,17292E-8	0,02919	0,11293	0,95977	0,68676	0,99497	0,18409	0,8585	0,69584	9,67473E-10	0,09949	0,71785	0,23996	0,24935	0,19277	0,22045	0,6443
"IL-12P40"	Spearman Corr.	-0,16473	0,50759*	0,03118	0,25771	0,33618*	0,24885	0,43841*	0,371*	0,50538*	0,27519	-0,20551	0,21059	0,48903*	1	0,12944	0,39942*	-0,15433	0,53889*	-0,00153	0,35993*	-0,12633	0,15131	0,31878*	0,42972*	0,55713*	0,27696*	0,42224*	0,3708*	0,42482*	0,41764*	0,501*	0,4557*	0,28522*	0,00916	0,14759	0,32248*	-0,15627	-0,07053	0,08586	0,48958*	0,1003	-0,01573	0,04929	-0,02833	-0,03654	0,07342	0,24994
	p-value	0,23849	1,43628E-4	0,82459	0,06246	0,01699	0,10334	0,00129	0,01432	0,00167	0,07409	0,13986	0,13799	4,20305E-4	--	0,35561	0,00305	0,26987	1,11627E-4	0,99131	0,00812	0,36737	0,32109	0,02126	0,0036	4,16453E-4	0,04468	0,00347	0,00739	0,00169	0,00207	1,5497E-4	6,05965E-4	0,03844	0,94812	0,29159	0,021	0,26383	0,61578	0,54099	4,13026E-4	0,4883	0,93078	0,77856	0,87167	0,83491	0,6751	0,09775
"MDC"	Spearman Corr.	0,28558*	-0,00289	0,26052*	0,31158*	-0,14527	-0,04023	0,10863	0,14697	-0,16088	-0,16439	0,16821	-0,32055*	0,04553	0,12944	1	-0,13489	-0,09875	0,22514	0,34743*	-0,27846*	0,37528*	0,00317	0,0814	0,10188	0,10115	0,07513	-0,06451	0,1579	0,13413	0,11061	-0,08087	0,0661	0,08561	-0,10759	0,17055	0,20636	-0,19003	0,22348	-0,07717	0,13356	0,024	0,44493*	0,0868	0,00206	-0,02928	-0,00948	-0,03452
	p-value	0,02698	0,9828	0,04439	0,01538	0,28096	0,78603	0,42119	0,3136	0,32787	0,26421	0,19888	0,01416	0,74615	0,35561	--	0,30413	0,45286	0,10505	0,00653	0,03271	0,0034	0,98256	0,53997	0,48143	0,54568	0,56834	0,64955	0,23648	0,31546	0,40427	0,54258	0,61889	0,51546	0,41324	0,19263	0,12353	0,14587	0,08608	0,55785	0,33097	0,86063	0,00513	0,59432	0,98991	0,85765	0,95371	0,80806
"IL-12P70"	Spearman Corr.	0,03757	0,15757	0,04081	0,1727	0,40817*	0,23962	0,49379*	0,4937*	0,65014*	0,43319*	0,06218	0,32427*	0,30991*	0,39942*	-0,13489	1	-0,05092	0,35686*	0,06896	0,22652	0,04118	0,23414	0,3701*	0,19972	0,11383	0,4222*	0,40777*	0,02821	0,28564*	0,39463*	0,19209	0,32384*	0,15054	0,14173	0,19012	0,13342	0,15218	-0,1271	0,25627*	0,11877	0,27298*	-0,34599*	-0,11578	0,04335	-0,11368	-0,04039	0,25819
	p-value	0,77566	0,2375	0,75688	0,187	0,00162	0,10092	9,48957E-5	3,12402E-4	7,48119E-6	0,0021	0,63696	0,01302	0,02393	0,00305	0,30413	--	0,69924	0,00872	0,60058	0,0845	0,75683	0,10172	0,00391	0,16436	0,4962	7,79092E-4	0,00269	0,83349	0,02974	0,00198	0,14497	0,01235	0,25093	0,28003	0,14567	0,32244	0,24574	0,33319	0,04811	0,38776	0,0418	0,03336	0,47681	0,79055	0,48488	0,80454	0,06459
"PDGF-AA"	Spearman Corr.	0,22606	-0,22348	0,14057	0,06619	-0,01184	-0,11384	-0,01174	-0,27554	-0,22785	-0,21694	0,26352*	0,03432	-0,15679	-0,15433	-0,09875	-0,05092	1	-9,67996E-4	0,25268	-0,02894	0,30637*	-0,15905	-0,14108	-0,01052	-0,2671	0,08041	-0,1662	-0,27061*	-0,11641	-0,09389	-0,20968	0,0859	-0,0795	-0,00272	0,06646	-0,09095	0,24438	0,14438	-0,16253	-0,27716*	-0,05969	-0,16556	-0,03922	0,02918	-0,08325	0,10519	0,04784
	p-value	0,08242	0,09174	0,28405	0,61534	0,93032	0,44103	0,93094	0,05533	0,163	0,13859	0,04191	0,79813	0,26221	0,26987	0,45286	0,69924	--	0,99451	0,05144	0,82778	0,01828	0,26993	0,28652	0,9422	0,10499	0,54136	0,23897	0,03992	0,38419	0,47937	0,11095	0,51772	0,546	0,98353	0,61388	0,50107	0,05987	0,27108	0,2147	0,0405	0,6621	0,32052	0,81009	0,85814	0,60956	0,51828	0,73627
"IL-13"	Spearman Corr.	0,04344	0,36377*	0,07042	0,24364	0,32344*	0,05928	0,59479*	0,47393*	0,39891*	0,25632	-0,05122	0,1564	0,73993*	0,53889*	0,22514	0,35686*	-9,67996E-4	1	0,04207	0,08007	0,06355	0,33125*	0,28606*	0,42035*	0,62694*	0,29469*	0,1963	0,32929*	0,57154*	0,62616*	0,63138*	0,45592*	0,29918*	-0,03126	0,16916	0,10145	-0,20205	0,1932	-0,06325	0,56564*	0,29853*	-0,01773	-0,11086	-0,05335	-0,14189	-0,14829	0,1508
	p-value	0,75744	0,00869	0,61631	0,07875	0,02195	0,7023	4,17098E-6	0,00133	0,01761	0,10574	0,71567	0,27308	2,80385E-9	1,11627E-4	0,10505	0,00872	0,99451	--	0,76487	0,57255	0,65448	0,02806	0,0398	0,00404	5,58114E-5	0,03219	0,19104	0,01714	9,62232E-6	5,31502E-7	5,20682E-7	6,82175E-4	0,02954	0,82417	0,22595	0,48327	0,14681	0,16572	0,65275	1,86472E-5	0,03522	0,92197	0,52608	0,76085	0,41619	0,39526	0,30625
"PDGF-AB/BB"	Spearman Corr.	0,2888*	0,0366	0,3172*	0,23805	-0,06055	-0,00114	-0,01281	-0,01997	0,00253	0,1164	0,32265*	0,12805	1,61307E-4	-0,00153	0,34743*	0,06896	0,25268	0,04207	1	0,01707	0,31192*	-0,09216	0,10875	0,16379	-0,26973	0,20947	-0,04503	0,12586	0,15192	0,07977	-0,02593	0,18053	-0,0274	0,11742	0,19433	0,23936	0,24746	0,11023	0,04985	-0,04699	0,07057	0,16513	0,23056	0,32325*	-0,27658	0,2193	0,15402
	p-value	0,02523	0,78504	0,01353	0,06701	0,65459	0,99386	0,92466	0,89165	0,98779	0,43079	0,01193	0,3381	0,99909	0,99131	0,00653	0,60058	0,05144	0,76487	--	0,8979	0,01617	0,52442	0,41227	0,25571	0,10148	0,10821	0,75124	0,34649	0,25495	0,54814	0,84546	0,17121	0,83539	0,37159	0,13679	0,07294	0,05662	0,4018	0,70524	0,73336	0,6053	0,32182	0,15233	0,0419	0,08405	0,17395	0,27565
"IL-15"	Spearman Corr.	-0,09204	0,0773	0,25551	0,03455	0,22431	0,36326*	0,29723*	0,17669	0,36*	0,25487	-0,12063	0,28684*	0,21461	0,35993*	-0,27846*	0,22652	-0,02894	0,08007	0,01707	1	-0,1834	-0,16768	0,52196*	0,10082	0,15981	0,24305	0,10027	-0,01679	0,08664	0,19266	0,40647*	0,12793	0,36849*	0,38816*	0,49595*	0,18096	0,28735*	0,07636	0,3679*	0,04497	0,26857*	-0,06907	0,09788	0,153	-0,04796	0,16725	0,14084
	p-value	0,4881	0,56763	0,0508	0,79503	0,09651	0,01208	0,0261	0,2296	0,02641	0,08382	0,36279	0,03052	0,12656	0,00812	0,03271	0,0845	0,82778	0,57255	0,8979	--	0,16818	0,24947	2,64454E-5	0,49064	0,34477	0,06361	0,48387	0,90136	0,52164	0,14736	0,00155	0,33857	0,00408	0,00238	6,4864E-5	0,18198	0,02733	0,56541	0,00415	0,74678	0,04741	0,68461	0,55332	0,35241	0,77187	0,30883	0,32425
"sCD40L"	Spearman Corr.	0,50006*	-0,04174	0,32715*	0,2475	0,1861	0,06425	0,08356	0,12592	0,008	-0,0626	0,44483*	-0,1927	-0,08403	-0,12633	0,37528*	0,04118	0,30637*	0,06355	0,31192*	-0,1834	1	-0,03176	-0,01978	-0,01751	-0,0786	0,08952	0,02192	-0,06765	0,04121	-0,00782	-0,25613	0,14402	0,03156	0,06645	0,10526	0,17643	0,22984	0,13109	0,04398	-0,0665	0,1232	-0,11784	-0,00719	-0,06348	-0,03321	-0,03027	-0,01198
	p-value	5,51439E-5	0,75787	0,01143	0,05876	0,16966	0,66789	0,53657	0,39377	0,96143	0,67255	4,15759E-4	0,15096	0,55366	0,36737	0,0034	0,75683	0,01828	0,65448	0,01617	0,16818	--	0,82851	0,88282	0,90497	0,63903	0,50015	0,87866	0,61705	0,76087	0,95355	0,0523	0,28078	0,81243	0,61703	0,42753	0,19334	0,07991	0,32232	0,74081	0,6328	0,37018	0,48731	0,96536	0,70105	0,84091	0,85484	0,93349
"IL-17A"	Spearman Corr.	0,10422	0,17953	-0,02465	0,22881	0,26074	0,03642	0,22738	-0,01876	0,01655	0,43212*	-0,08068	0,12928	0,24553	0,15131	0,00317	0,23414	-0,15905	0,33125*	-0,09216	-0,16768	-0,03176	1	0,0471	0,4255*	0,49358*	0,15467	0,47043*	0,08717	0,14675	0,26968	0,18993	0,16732	-0,13625	0,08745	-0,04406	-0,0744	-0,23514	-0,0856	-0,02194	0,27725	0,16069	0,00999	-0,10714	-0,14392	-0,05615	-0,12348	-0,21978
	p-value	0,47135	0,2221	0,86507	0,10997	0,0767	0,82345	0,12013	0,90732	0,92483	0,00601	0,57756	0,38117	0,10817	0,32109	0,98256	0,10172	0,26993	0,02806	0,52442	0,24947	0,82851	--	0,74536	0,00497	0,0041	0,2835	0,00146	0,55145	0,31432	0,06094	0,19117	0,24547	0,34544	0,54591	0,76125	0,61526	0,10022	0,55446	0,87981	0,06213	0,28606	0,95747	0,55287	0,42426	0,7563	0,49357	0,15675
"IL-1RA"	Spearman Corr.	0,15858	0,20322	0,11641	0,40615*	0,41703*	0,42065*	0,59045*	0,41754*	0,37736*	0,43099*	0,21847	0,41142*	0,40399*	0,31878*	0,0814	0,3701*	-0,14108	0,28606*	0,10875	0,52196*	-0,01978	0,0471	1	0,53601*	0,38228*	0,52025*	0,41684*	-0,03218	0,35228*	0,37626*	0,524*	0,49484*	0,47006*	0,49706*	0,61873*	0,35324*	0,25182	0,24258	0,59962*	0,21741	0,40934*	0,01844	-0,05341	0,19431	-0,32798*	-0,04613	0,15069
	p-value	0,23028	0,12948	0,37993	0,00141	0,00139	0,00324	1,669E-6	0,00284	0,01951	0,00249	0,09645	0,00148	0,00298	0,02126	0,53997	0,00391	0,28652	0,0398	0,41227	2,64454E-5	0,88282	0,74536	--	7,20869E-5	0,01954	2,40601E-5	0,00234	0,81219	0,0072	0,0036	2,42752E-5	7,85856E-5	1,72394E-4	6,21075E-5	1,76255E-7	0,00703	0,05435	0,06414	5,21064E-7	0,11428	0,00191	0,91375	0,74675	0,23589	0,04151	0,78037	0,2912
"IL-1a"	Spearman Corr.	0,12148	0,43109*	-6,72463E-4	0,5206*	0,30654*	0,33533*	0,26912	0,20719	0,21404	0,27078	0,07272	0,4112*	0,64336*	0,42972*	0,10188	0,19972	-0,01052	0,42035*	0,16379	0,10082	-0,01751	0,4255*	0,53601*	1	0,76541*	0,6219*	0,50249*	0,16657	0,63049*	0,50518*	0,56981*	0,49506*	0,14079	0,09304	0,10534	0,17769	0,00994	0,28679*	0,09178	0,54307*	0,24246	0,00182	0,01514	0,0718	-0,1442	-0,00552	-0,20609
	p-value	0,40071	0,00199	0,9963	1,06365E-4	0,03408	0,02994	0,06736	0,19956	0,23946	0,09103	0,61575	0,00333	2,47451E-6	0,0036	0,48143	0,16436	0,9422	0,00404	0,25571	0,49064	0,90497	0,00497	7,20869E-5	--	1,34275E-7	1,4308E-6	5,09256E-4	0,25265	1,56484E-6	2,13799E-4	1,92468E-5	2,98877E-4	0,32946	0,52045	0,46659	0,23212	0,94536	0,04346	0,52616	8,00714E-5	0,10058	0,99227	0,93337	0,6913	0,42336	0,97569	0,17955
"IL-9"	Spearman Corr.	0,06448	0,43639*	-0,09754	0,41123*	0,35652*	0,2364	0,44319*	0,21437	0,45769*	0,30797	-0,13169	0,15051	0,83627*	0,55713*	0,10115	0,11383	-0,2671	0,62694*	-0,26973	0,15981	-0,0786	0,49358*	0,38228*	0,76541*	1	0,4251*	0,53177*	0,36241*	0,71353*	0,68169*	0,69821*	0,32983*	0,17635	0,01773	0,12797	8,3022E-4	-0,25179	0,18578	0,05955	0,66455*	0,22914	0,2215	0,03561	-0,34396	0,17858	-0,00741	-0,13047
	p-value	0,70054	0,00616	0,56019	0,01032	0,03031	0,18534	0,00601	0,23873	0,00844	0,07189	0,43062	0,36707	3,98206E-10	4,16453E-4	0,54568	0,4962	0,10499	5,58114E-5	0,10148	0,34477	0,63903	0,0041	0,01954	1,34275E-7	--	0,0078	0,00101	0,0275	7,15574E-7	2,45222E-6	1,55214E-6	0,04315	0,28954	0,91584	0,44388	0,99611	0,12726	0,26411	0,72246	5,36335E-6	0,17251	0,33457	0,87186	0,10804	0,41492	0,97321	0,46926
"IL-1b"	Spearman Corr.	0,21417	0,24205	0,03516	0,43957*	0,39255*	0,3048*	0,48758*	0,26867	0,47094*	0,29385*	0,19968	0,271*	0,4807*	0,27696*	0,07513	0,4222*	0,08041	0,29469*	0,20947	0,24305	0,08952	0,15467	0,52025*	0,6219*	0,4251*	1	0,33303*	-0,13397	0,37919*	0,45895*	0,35633*	0,34818*	0,20658	0,15954	0,29564*	0,22846	0,09311	0,07671	0,17847	0,1004	0,42842*	-0,11451	-0,09276	-0,00475	-0,17441	-0,03531	0,02558
	p-value	0,10034	0,06717	0,78971	4,41471E-4	0,00253	0,03516	1,19638E-4	0,06196	0,00248	0,04264	0,12611	0,03962	2,69235E-4	0,04468	0,56834	7,79092E-4	0,54136	0,03219	0,10821	0,06361	0,50015	0,2835	2,40601E-5	1,4308E-6	0,0078	--	0,01585	0,31603	0,00333	2,56112E-4	0,0056	0,00689	0,11327	0,22336	0,02183	0,0874	0,4792	0,56018	0,17246	0,46581	9,87563E-4	0,49361	0,56914	0,9768	0,28176	0,82875	0,85715
"IL-2"	Spearman Corr.	0,0355	0,54645*	-0,08799	0,50103*	0,49092*	0,19615	0,48157*	0,39895*	0,49313*	0,50803*	-0,00555	0,29983*	0,32453*	0,42224*	-0,06451	0,40777*	-0,1662	0,1963	-0,04503	0,10027	0,02192	0,47043*	0,41684*	0,50249*	0,53177*	0,33303*	1	0,33027*	0,35038*	0,2306	0,30751*	0,51241*	-0,00974	0,23281	0,16295	0,0024	-0,06447	-0,07231	0,21907	0,24354	0,12715	-0,14758	-0,15588	-0,0536	-0,14937	-0,17251	0,18088
	p-value	0,80268	2,77969E-5	0,53505	1,54852E-4	3,41766E-4	0,20191	3,99134E-4	0,00731	0,00224	4,30832E-4	0,96883	0,03255	0,02604	0,00347	0,64955	0,00269	0,23897	0,19104	0,75124	0,48387	0,87866	0,00146	0,00234	5,09256E-4	0,00101	0,01585	--	0,01793	0,01261	0,10353	0,02658	1,2105E-4	0,94536	0,09673	0,2484	0,98679	0,64976	0,61043	0,11868	0,09175	0,3789	0,41244	0,37123	0,75977	0,39176	0,32169	0,23441
"IL-3"	Spearman Corr.	-0,0977	0,43205*	-0,04058	0,05132	0,00293	-0,2283	0,02167	0,12812	0,24213	0,09472	-0,19383	0,10411	0,20462	0,3708*	0,1579	0,02821	-0,27061*	0,32929*	0,12586	-0,01679	-0,06765	0,08717	-0,03218	0,16657	0,36241*	-0,13397	0,33027*	1	0,40351*	0,05513	0,21948	0,0647	0,04515	-0,16736	-0,1543	-0,10108	-0,26122*	-0,15948	-0,1278	0,49104*	-0,11406	0,09935	-0,04355	-0,21667	0,10331	-0,01538	0,18936
	p-value	0,46563	8,84051E-4	0,76232	0,70204	0,98306	0,12272	0,87521	0,39077	0,14302	0,53123	0,14487	0,44512	0,14976	0,00739	0,23648	0,83349	0,03992	0,01714	0,34649	0,90136	0,61705	0,55145	0,81219	0,25265	0,0275	0,31603	0,01793	--	0,00204	0,68378	0,10092	0,63257	0,73645	0,20921	0,24749	0,46276	0,04764	0,23178	0,33906	1,63231E-4	0,40699	0,55854	0,79236	0,18521	0,53141	0,92596	0,18783
"IL-4"	Spearman Corr.	0,14026	0,30261*	0,03945	0,39278*	0,2142	0,10991	0,2869*	0,46474*	0,46545*	0,14469	0,28891*	0,12223	0,70231*	0,42482*	0,13413	0,28564*	-0,11641	0,57154*	0,15192	0,08664	0,04121	0,14675	0,35228*	0,63049*	0,71353*	0,37919*	0,35038*	0,40351*	1	0,50008*	0,50737*	0,3671*	0,22359	-0,0557	-0,06459	0,07319	-0,02203	0,15777	0,06173	0,6711*	-0,02971	0,11191	0,13388	0,1498	-0,19919	0,13442	3,87146E-4
	p-value	0,29367	0,0234	0,76875	0,00229	0,11633	0,46208	0,0337	8,75164E-4	0,00323	0,33737	0,02784	0,36948	9,27778E-9	0,00169	0,31546	0,02974	0,38419	9,62232E-6	0,25495	0,52164	0,76087	0,31432	0,0072	1,56484E-6	7,15574E-7	0,00333	0,01261	0,00204	--	7,467E-5	5,62422E-5	0,00459	0,09157	0,67795	0,63002	0,59538	0,8696	0,23689	0,64526	3,81485E-8	0,83112	0,51581	0,42292	0,36936	0,23056	0,42106	0,99787
"IL-5"	Spearman Corr.	0,06863	0,20636	-0,01627	0,22126	0,11193	0,19723	0,55633*	0,38054*	0,5331*	0,22321	0,07389	0,22352	0,703*	0,41764*	0,11061	0,39463*	-0,09389	0,62616*	0,07977	0,19266	-0,00782	0,26968	0,37626*	0,50518*	0,68169*	0,45895*	0,2306	0,05513	0,50008*	1	0,51403*	0,26222*	0,2081	0,00213	0,12696	0,11976	-0,16439	0,08333	0,02028	0,52165*	0,2253	0,06158	-0,02381	0,29983	-0,46068*	0,05036	-0,06669
	p-value	0,60554	0,12354	0,90264	0,09216	0,41148	0,1839	8,5078E-6	0,00763	4,75509E-4	0,13153	0,5781	0,09465	4,38751E-9	0,00207	0,40427	0,00198	0,47937	5,31502E-7	0,54814	0,14736	0,95355	0,06094	0,0036	2,13799E-4	2,45222E-6	2,56112E-4	0,10353	0,68378	7,467E-5	--	3,67214E-5	0,04676	0,11373	0,9872	0,33796	0,37933	0,21344	0,53033	0,87883	4,42543E-5	0,09817	0,71729	0,88558	0,06367	0,00316	0,76077	0,64193
"IL-6"	Spearman Corr.	-0,02066	0,40296*	-0,02642	0,24157	0,29248*	0,25388	0,43224*	0,35023*	0,46311*	0,39344*	-0,1023	0,35307*	0,66588*	0,501*	-0,08087	0,19209	-0,20968	0,63138*	-0,02593	0,40647*	-0,25613	0,18993	0,524*	0,56981*	0,69821*	0,35633*	0,30751*	0,21948	0,50737*	0,51403*	1	0,4514*	0,39146*	0,16043	0,19834	0,14809	-0,06454	0,08266	0,1791	0,55455*	0,43372*	-0,16101	-0,22462	0,11817	-0,28966	-0,26292	0,13565
	p-value	0,87655	0,00188	0,84254	0,06529	0,02871	0,08164	8,78839E-4	0,01467	0,00299	0,00567	0,44072	0,00706	7,17292E-8	1,5497E-4	0,54258	0,14497	0,11095	5,20682E-7	0,84546	0,00155	0,0523	0,19117	2,42752E-5	1,92468E-5	1,55214E-6	0,0056	0,02658	0,10092	5,62422E-5	3,67214E-5	--	3,75762E-4	0,00217	0,22481	0,13209	0,27604	0,62724	0,53368	0,17471	1,35458E-5	9,39644E-4	0,33419	0,16348	0,46772	0,06983	0,10119	0,34256
"IL-7"	Spearman Corr.	0,07207	0,39707*	-0,01336	0,28788*	0,5433*	0,3244*	0,48648*	0,36576*	0,24493	0,52217*	0,31917*	0,31952*	0,30266*	0,4557*	0,0661	0,32384*	0,0859	0,45592*	0,18053	0,12793	0,14402	0,16732	0,49484*	0,49506*	0,32983*	0,34818*	0,51241*	0,0647	0,3671*	0,26222*	0,4514*	1	0,21511	0,3247*	0,31353*	0,31901*	0,12469	0,20811	0,3717*	0,18125	0,2864*	-0,03855	-0,13879	0,0075	-0,24966	-0,09841	0,20265
	p-value	0,58753	0,00223	0,92	0,02704	1,5135E-5	0,0261	1,4381E-4	0,01057	0,13288	1,66807E-4	0,01374	0,0154	0,02919	6,05965E-4	0,61889	0,01235	0,51772	6,82175E-4	0,17121	0,33857	0,28078	0,24547	7,85856E-5	2,98877E-4	0,04315	0,00689	1,2105E-4	0,63257	0,00459	0,04676	3,75762E-4	--	0,10181	0,0121	0,0156	0,01656	0,34671	0,11372	0,00375	0,18964	0,03402	0,82079	0,39943	0,96388	0,12533	0,55114	0,15382
"IL-8"	Spearman Corr.	0,07694	0,13203	0,24541	0,10479	0,11097	-0,00369	0,16381	0,2972*	0,3937*	0,30163*	0,12226	0,23234	0,2203	0,28522*	0,08561	0,15054	-0,0795	0,29918*	-0,0274	0,36849*	0,03156	-0,13625	0,47006*	0,14079	0,17635	0,20658	-0,00974	0,04515	0,22359	0,2081	0,39146*	0,21511	1	0,05735	0,45408*	0,42575*	0,20845	0,02954	0,35515*	0,13653	0,13508	0,01061	-0,22034	-0,03913	-0,13008	-0,195	0,1638
	p-value	0,55902	0,32319	0,05876	0,42556	0,4112	0,98013	0,22339	0,0381	0,01315	0,03721	0,35207	0,07925	0,11293	0,03844	0,51546	0,25093	0,546	0,02954	0,83539	0,00408	0,81243	0,34544	1,72394E-4	0,32946	0,28954	0,11327	0,94536	0,73645	0,09157	0,11373	0,00217	0,10181	--	0,66338	2,6828E-4	9,60637E-4	0,10997	0,82274	0,00536	0,32027	0,3209	0,94957	0,17188	0,81056	0,4237	0,2279	0,24592
"IP-10"	Spearman Corr.	0,12048	-0,02937	-0,00256	0,01331	0,24121	0,2734	0,32028*	0,09987	0,06069	0,26916	0,12487	0,21402	0,0071	0,00916	-0,10759	0,14173	-0,00272	-0,03126	0,11742	0,38816*	0,06645	0,08745	0,49706*	0,09304	0,01773	0,15954	0,23281	-0,16736	-0,0557	0,00213	0,16043	0,3247*	0,05735	1	0,47447*	0,32217*	0,29617*	0,12279	0,64526*	-0,07766	0,32171*	-0,02561	0,12978	0,1688	-0,20216	0,22371	0,21488
	p-value	0,35918	0,82679	0,98453	0,9196	0,07068	0,06008	0,01515	0,49477	0,71363	0,06432	0,34181	0,1067	0,95977	0,94812	0,41324	0,28003	0,98353	0,82417	0,37159	0,00238	0,61703	0,54591	6,21075E-5	0,52045	0,91584	0,22336	0,09673	0,20921	0,67795	0,9872	0,22481	0,0121	0,66338	--	1,28187E-4	0,01453	0,02158	0,34998	2,61314E-8	0,57304	0,01561	0,87872	0,42478	0,29777	0,21094	0,16523	0,12607
"MCP-1"	Spearman Corr.	0,10086	0,06113	0,3688*	0,20532	0,28355*	0,30022*	0,41549*	0,13072	0,25115	0,32899*	0,23362	0,32502*	0,0567	0,14759	0,17055	0,19012	0,06646	0,16916	0,19433	0,49595*	0,10526	-0,04406	0,61873*	0,10534	0,12797	0,29564*	0,16295	-0,1543	-0,06459	0,12696	0,19834	0,31353*	0,45408*	0,47447*	1	0,40958*	0,32765*	0,13337	0,51424*	-0,10242	0,45081*	0,20419	-0,00591	0,02299	-0,05096	0,04739	0,34938*
	p-value	0,44321	0,64849	0,00374	0,11554	0,03256	0,03815	0,00131	0,37064	0,12301	0,02242	0,07242	0,0128	0,68676	0,29159	0,19263	0,14567	0,61388	0,22595	0,13679	6,4864E-5	0,42753	0,76125	1,76255E-7	0,46659	0,44388	0,02183	0,2484	0,24749	0,63002	0,33796	0,13209	0,0156	2,6828E-4	1,28187E-4	--	0,00156	0,0106	0,30967	2,635E-5	0,45683	4,88948E-4	0,21882	0,97112	0,88803	0,75482	0,77153	0,01113
"MIP-1a"	Spearman Corr.	-0,00613	0,07088	0,17541	0,12768	0,09035	0,21535	0,0522	0,23837	0,16116	0,36788*	0,20293	0,21081	9,05244E-4	0,32248*	0,20636	0,13342	-0,09095	0,10145	0,23936	0,18096	0,17643	-0,0744	0,35324*	0,17769	8,3022E-4	0,22846	0,0024	-0,10108	0,07319	0,11976	0,14809	0,31901*	0,42575*	0,32217*	0,40958*	1	0,36424*	0,00444	0,46378*	-0,18385	0,15067	-0,09321	-0,04138	0,186	-0,21307	0,01916	0,21621
	p-value	0,96393	0,60709	0,19184	0,34391	0,51183	0,15062	0,70776	0,09908	0,33373	0,01096	0,13005	0,12236	0,99497	0,021	0,12353	0,32244	0,50107	0,48327	0,07294	0,18198	0,19334	0,61526	0,00703	0,23212	0,99611	0,0874	0,98679	0,46276	0,59538	0,37933	0,27604	0,01656	9,60637E-4	0,01453	0,00156	--	0,00535	0,97385	2,79633E-4	0,192	0,2768	0,58872	0,80517	0,26354	0,199	0,9091	0,13567
"MIP-1b"	Spearman Corr.	0,00636	-0,2245	0,21027	-0,0698	0,08268	0,28	-0,08502	-0,01001	0,05821	0,08963	0,27269*	0,3102*	-0,18528	-0,15627	-0,19003	0,15218	0,24438	-0,20205	0,24746	0,28735*	0,22984	-0,23514	0,25182	0,00994	-0,25179	0,09311	-0,06447	-0,26122*	-0,02203	-0,16439	-0,06454	0,12469	0,20845	0,29617*	0,32765*	0,36424*	1	0,19328	0,47893*	-0,21681	0,12141	-0,15594	-0,03219	0,04448	-0,01319	0,04725	0,03089
	p-value	0,96152	0,09023	0,10683	0,59614	0,54093	0,05391	0,52945	0,94556	0,72486	0,54461	0,03504	0,0178	0,18409	0,26383	0,14587	0,24574	0,05987	0,14681	0,05662	0,02733	0,07991	0,10022	0,05435	0,94536	0,12726	0,4792	0,64976	0,04764	0,8696	0,21344	0,62724	0,34671	0,10997	0,02158	0,0106	0,00535	--	0,13897	1,08363E-4	0,11185	0,37275	0,34983	0,84369	0,78522	0,93563	0,77218	0,82793
"RANTES"	Spearman Corr.	0,16308	-0,19191	0,17794	0,04906	0,13961	0,18418	-0,06521	0,02365	-0,32288*	-0,15928	0,13673	0,14221	-0,02508	-0,07053	0,22348	-0,1271	0,14438	0,1932	0,11023	0,07636	0,13109	-0,0856	0,24258	0,28679*	0,18578	0,07671	-0,07231	-0,15948	0,15777	0,08333	0,08266	0,20811	0,02954	0,12279	0,13337	0,00444	0,19328	1	0,19841	0,0221	0,19929	0,31263	0,09375	0,0274	-0,00253	0,00995	-0,24317
	p-value	0,21315	0,14896	0,17376	0,70971	0,30033	0,21015	0,62985	0,87185	0,04498	0,27953	0,29752	0,28692	0,8585	0,61578	0,08608	0,33319	0,27108	0,16572	0,4018	0,56541	0,32232	0,55446	0,06414	0,04346	0,26411	0,56018	0,61043	0,23178	0,23689	0,53033	0,53368	0,11372	0,82274	0,34998	0,30967	0,97385	0,13897	--	0,12859	0,87273	0,14088	0,056	0,56504	0,86672	0,98762	0,95143	0,08237
"TNFa"	Spearman Corr.	0,22516	-0,02524	0,05046	-0,02155	0,27497*	0,29119*	0,18057	0,25093	0,33678*	0,33126*	0,2547*	0,39058*	-0,05497	0,08586	-0,07717	0,25627*	-0,16253	-0,06325	0,04985	0,3679*	0,04398	-0,02194	0,59962*	0,09178	0,05955	0,17847	0,21907	-0,1278	0,06173	0,02028	0,1791	0,3717*	0,35515*	0,64526*	0,51424*	0,46378*	0,47893*	0,19841	1	-0,08745	0,28841*	-0,05581	-0,02599	0,11542	-0,22441	-0,01806	0,32051*
	p-value	0,08368	0,8508	0,70179	0,87017	0,03845	0,04464	0,1789	0,08201	0,03604	0,02145	0,04954	0,00244	0,69584	0,54099	0,55785	0,04811	0,2147	0,65275	0,70524	0,00415	0,74081	0,87981	5,21064E-7	0,52616	0,72246	0,17246	0,11868	0,33906	0,64526	0,87883	0,17471	0,00375	0,00536	2,61314E-8	2,635E-5	2,79633E-4	1,08363E-4	0,12859	--	0,52551	0,03112	0,73928	0,8735	0,47821	0,16388	0,9119	0,02053
"TNFb"	Spearman Corr.	-0,07604	0,34285*	-0,09286	0,15844	0,05703	0,13013	0,33701*	0,28789	0,31578	0,04207	-0,15746	0,159	0,74311*	0,48958*	0,13356	0,11877	-0,27716*	0,56564*	-0,04699	0,04497	-0,0665	0,27725	0,21741	0,54307*	0,66455*	0,1004	0,24354	0,49104*	0,6711*	0,52165*	0,55455*	0,18125	0,13653	-0,07766	-0,10242	-0,18385	-0,21681	0,0221	-0,08745	1	0,00519	0,21507	0,17848	-0,00287	-0,06935	0,10464	-0,02799
	p-value	0,58111	0,01115	0,50012	0,24794	0,68503	0,40556	0,0136	0,05236	0,05692	0,78629	0,25094	0,25546	9,67473E-10	4,13026E-4	0,33097	0,38776	0,0405	1,86472E-5	0,73336	0,74678	0,6328	0,06213	0,11428	8,00714E-5	5,36335E-6	0,46581	0,09175	1,63231E-4	3,81485E-8	4,42543E-5	1,35458E-5	0,18964	0,32027	0,57304	0,45683	0,192	0,11185	0,87273	0,52551	--	0,97087	0,22938	0,30498	0,98693	0,69223	0,54969	0,85187
"VEGF"	Spearman Corr.	0,09115	0,18877	0,12643	0,02448	0,45878*	0,3791*	0,31545*	0,16677	0,26243	0,34491*	0,08161	0,20998	0,23326	0,1003	0,024	0,27298*	-0,05969	0,29853*	0,07057	0,26857*	0,1232	0,16069	0,40934*	0,24246	0,22914	0,42842*	0,12715	-0,11406	-0,02971	0,2253	0,43372*	0,2864*	0,13508	0,32171*	0,45081*	0,15067	0,12141	0,19929	0,28841*	0,00519	1	0,0621	-0,28407	-0,04048	-0,1889	-0,25486	0,10309
	p-value	0,50408	0,17161	0,35314	0,85786	5,50228E-4	0,01022	0,0214	0,26798	0,11661	0,02032	0,54989	0,12752	0,09949	0,4883	0,86063	0,0418	0,6621	0,03522	0,6053	0,04741	0,37018	0,28606	0,00191	0,10058	0,17251	9,87563E-4	0,3789	0,40699	0,83112	0,09817	9,39644E-4	0,03402	0,3209	0,01561	4,88948E-4	0,2768	0,37275	0,14088	0,03112	0,97087	--	0,71901	0,08391	0,80934	0,25603	0,12254	0,48087
"BMI"	Spearman Corr.	-0,18132	-0,09612	-0,07436	-0,00503	-0,25996	-0,06419	-0,16665	-0,14679	-0,2137	-0,16215	0,04826	-0,04286	-0,06535	-0,01573	0,44493*	-0,34599*	-0,16556	-0,01773	0,16513	-0,06907	-0,11784	0,00999	0,01844	0,00182	0,2215	-0,11451	-0,14758	0,09935	0,11191	0,06158	-0,16101	-0,03855	0,01061	-0,02561	0,20419	-0,09321	-0,15594	0,31263	-0,05581	0,21507	0,0621	1	0,31801	0,06042	0,067	0,27211	-0,24893
	p-value	0,27595	0,57146	0,65727	0,97607	0,13152	0,72266	0,33135	0,43069	0,28449	0,38349	0,77357	0,80114	0,71785	0,93078	0,00513	0,03336	0,32052	0,92197	0,32182	0,68461	0,48731	0,95747	0,91375	0,99227	0,33457	0,49361	0,41244	0,55854	0,51581	0,71729	0,33419	0,82079	0,94957	0,87872	0,21882	0,58872	0,34983	0,056	0,73928	0,22938	0,71901	--	0,05169	0,71859	0,68939	0,09839	0,13735
"Total cholesterol, mMol/L"	Spearman Corr.	0,08586	-0,11523	0,17563	0,0891	-0,03829	0,04785	0,03303	0,04025	0,07011	-0,24868	-0,03913	-0,28234	0,20394	0,04929	0,0868	-0,11578	-0,03922	-0,11086	0,23056	0,09788	-0,00719	-0,10714	-0,05341	0,01514	0,03561	-0,09276	-0,15588	-0,04355	0,13388	-0,02381	-0,22462	-0,13879	-0,22034	0,12978	-0,00591	-0,04138	-0,03219	0,09375	-0,02599	0,17848	-0,28407	0,31801	1	0,44415*	0,01929	0,90017*	-0,24075
	p-value	0,59833	0,48483	0,27836	0,58454	0,822	0,78487	0,84393	0,824	0,71779	0,16286	0,81054	0,0816	0,23996	0,77856	0,59432	0,47681	0,81009	0,52608	0,15233	0,55332	0,96536	0,55287	0,74675	0,93337	0,87186	0,56914	0,37123	0,79236	0,42292	0,88558	0,16348	0,39943	0,17188	0,42478	0,97112	0,80517	0,84369	0,56504	0,8735	0,30498	0,08391	0,05169	--	0,00409	0,90594	2,72557E-15	0,13984
"Atherogenic index"	Spearman Corr.	0,08098	-0,07016	0,06812	-0,12968	-0,05439	-0,02473	0,10921	0,1498	-0,02332	-0,001	0,21731	-0,0707	0,2	-0,02833	0,00206	0,04335	0,02918	-0,05335	0,32325*	0,153	-0,06348	-0,14392	0,19431	0,0718	-0,34396	-0,00475	-0,0536	-0,21667	0,1498	0,29983	0,11817	0,0075	-0,03913	0,1688	0,02299	0,186	0,04448	0,0274	0,11542	-0,00287	-0,04048	0,06042	0,44415*	1	-0,7885*	0,39323*	-0,01379
	p-value	0,61939	0,67127	0,67618	0,42514	0,74916	0,88784	0,51395	0,40536	0,90444	0,99558	0,17799	0,66886	0,24935	0,87167	0,98991	0,79055	0,85814	0,76085	0,0419	0,35241	0,70105	0,42426	0,23589	0,6913	0,10804	0,9768	0,75977	0,18521	0,36936	0,06367	0,46772	0,96388	0,81056	0,29777	0,88803	0,26354	0,78522	0,86672	0,47821	0,98693	0,80934	0,71859	0,00409	--	1,5282E-9	0,01207	0,93361
"HDL"	Spearman Corr.	-0,1282	-0,09659	0,08954	0,19677	-0,12088	0,03006	-0,25441	-0,19098	-0,0558	-0,24636	-0,37841*	-0,11721	-0,22549	-0,03654	-0,02928	-0,11368	-0,08325	-0,14189	-0,27658	-0,04796	-0,03321	-0,05615	-0,32798*	-0,1442	0,17858	-0,17441	-0,14937	0,10331	-0,19919	-0,46068*	-0,28966	-0,24966	-0,13008	-0,20216	-0,05096	-0,21307	-0,01319	-0,00253	-0,22441	-0,06935	-0,1889	0,067	0,01929	-0,7885*	1	-0,00178	-0,09823
	p-value	0,43048	0,55857	0,5827	0,22362	0,47604	0,86388	0,12322	0,28705	0,77372	0,16695	0,01605	0,47732	0,19277	0,83491	0,85765	0,48488	0,60956	0,41619	0,08405	0,77187	0,84091	0,7563	0,04151	0,42336	0,41492	0,28176	0,39176	0,53141	0,23056	0,00316	0,06983	0,12533	0,4237	0,21094	0,75482	0,199	0,93563	0,98762	0,16388	0,69223	0,25603	0,68939	0,90594	1,5282E-9	--	0,99128	0,55191
"LDL"	Spearman Corr.	-0,03922	-0,19108	0,08544	-0,06025	-0,09476	-0,03335	0,0688	-0,04628	0,10032	-0,26384	-0,0092	-0,20661	0,21246	0,07342	-0,00948	-0,04039	0,10519	-0,14829	0,2193	0,16725	-0,03027	-0,12348	-0,04613	-0,00552	-0,00741	-0,03531	-0,17251	-0,01538	0,13442	0,05036	-0,26292	-0,09841	-0,195	0,22371	0,04739	0,01916	0,04725	0,00995	-0,01806	0,10464	-0,25486	0,27211	0,90017*	0,39323*	-0,00178	1	-0,23677
	p-value	0,81009	0,24393	0,60012	0,71191	0,57694	0,84914	0,68149	0,79815	0,6046	0,13791	0,95509	0,20696	0,22045	0,6751	0,95371	0,80454	0,51828	0,39526	0,17395	0,30883	0,85484	0,49357	0,78037	0,97569	0,97321	0,82875	0,32169	0,92596	0,42106	0,76077	0,10119	0,55114	0,2279	0,16523	0,77153	0,9091	0,77218	0,95143	0,9119	0,54969	0,12254	0,09839	2,72557E-15	0,01207	0,99128	--	0,14671
"SELENA-SLEDAI"	Spearman Corr.	0,15861	0,24077	-0,0458	-0,06003	0,14177	0,10319	0,09751	0,21845	0,45619*	0,20673	0,04066	0,35833*	-0,06991	0,24994	-0,03452	0,25819	0,04784	0,1508	0,15402	0,14084	-0,01198	-0,21978	0,15069	-0,20609	-0,13047	0,02558	0,18088	0,18936	3,87146E-4	-0,06669	0,13565	0,20265	0,1638	0,21488	0,34938*	0,21621	0,03089	-0,24317	0,32051*	-0,02799	0,10309	-0,24893	-0,24075	-0,01379	-0,09823	-0,23677	1
	p-value	0,26139	0,08877	0,74713	0,67247	0,33121	0,51551	0,5005	0,17003	0,00517	0,1947	0,77471	0,00983	0,6443	0,09775	0,80806	0,06459	0,73627	0,30625	0,27565	0,32425	0,93349	0,15675	0,2912	0,17955	0,46926	0,85715	0,23441	0,18783	0,99787	0,64193	0,34256	0,15382	0,24592	0,12607	0,01113	0,13567	0,82793	0,08237	0,02053	0,85187	0,48087	0,13735	0,13984	0,93361	0,55191	0,14671	--
2-tailed test of significance is used
*: Correlation is significant at the 0.05 level
