# Supplementary material for: Multiplex Analysis of Serum Cytokine Profiles in Systemic Lupus Erythematosus and Multiple Sclerosis
Source: Int J Mol Sci. 2022 Nov 10;23(22):13829. doi: 10.3390/ijms232213829 (PMC9695219; doi:10.3390/ijms232213829)
Supplement: Supplementary file 1 [file ijms-23-13829-s001.zip › Table S7.xlsx]

## Sheet: Лист1
Table S7. Correlation matrix for a group of MS patients.
		EGF	FGF-2	Eotaxin	TGF-a	G-CSF	Flt-3L	GM-CSF	Fractalkine	IFNa2	IFNy	GRO	IL-10	MCP-3	IL-12P40	MDC	IL-12P70	PDGF-AA	IL-13	PDGF-AB/BB	IL-15	sCD40L	IL-17A	IL-1RA	IL-1a	IL-9	IL-1b	IL-2	IL-3	IL-4	IL-5	IL-6	IL-7	IL-8	IP-10	MCP-1	MIP-1a	MIP-1b	RANTES	TNFa	TNFb	VEGF	EDSS	Age
"EGF"	Spearman Corr.	1	-0,08653	0,17903	0,41609*	0,20497	0,34148*	0,38317*	0,34733*	0,23587	0,14676	0,20489	0,19446	0,16141	0,09697	0,16655	0,49737*	0,02711	0,15934	0,20571	0,04535	0,10877	0,35892*	0,1482	0,41192*	0,26588	0,57794*	0,16023	-0,08352	0,28415*	0,39542*	0,0774	0,18983	0,37763*	0,15928	0,12657	0,04369	0,13914	-0,21285	0,20807	0,09353	0,27806	0,04977	-0,09031
	p-value	--	0,56306	0,20411	0,00215	0,18197	0,02502	0,00602	0,01803	0,1483	0,37265	0,1451	0,17599	0,27308	0,52147	0,23798	2,04737E-4	0,84871	0,29579	0,14345	0,75202	0,45212	0,0181	0,30951	0,01255	0,09292	7,23749E-6	0,29308	0,55608	0,0433	0,00408	0,59319	0,20123	0,00578	0,25938	0,37127	0,81549	0,32523	0,12977	0,13883	0,53176	0,05843	0,78329	0,55519
"FGF-2"	Spearman Corr.	-0,08653	1	0,04247	-0,22777	0,02687	0,02497	-0,33423*	0,24314	-0,04254	0,11789	-0,0356	0,31259*	0,38567*	0,41364*	-0,04912	-0,23377	0,01452	0,18999	-0,18298	0,4977*	0,16497	0,02234	0,20429	0,1715	0,14071	-0,09004	0,50949*	0,65127*	0,44815*	-0,03911	0,31358*	0,38088*	-0,09911	0,17899	0,0436	0,03311	-0,00897	-0,02729	0,48404*	0,53223*	0,32331*	-0,13477	-0,11976
	p-value	0,56306	--	0,772	0,11549	0,86757	0,87687	0,02167	0,11175	0,80258	0,4871	0,80813	0,03242	0,00972	0,00525	0,73751	0,10979	0,92115	0,22235	0,20824	3,19111E-4	0,26249	0,89118	0,17325	0,33994	0,3802	0,5384	6,6822E-4	4,03343E-7	0,0014	0,79183	0,02998	0,00985	0,49807	0,21849	0,76613	0,86461	0,95122	0,85232	4,25417E-4	1,67877E-4	0,0284	0,46977	0,45579
"Eotaxin"	Spearman Corr.	0,17903	0,04247	1	0,07237	0,37432*	0,08304	0,10654	0,14865	0,01027	0,18476	0,46679*	0,08517	0,05371	0,05276	0,02749	0,17729	0,45945*	0,10808	0,32302*	0,09832	0,37269*	0,01009	0,05776	0,19667	0,30521*	0,17026	0,09203	0,07224	0,1573	0,28216*	0,05001	0,34169*	0,47077*	0,0676	0,6596*	0,40139*	0,44817*	0,13629	0,12698	0,15876	0,14733	0,21994	0,25709
	p-value	0,20411	0,772	--	0,59952	0,01038	0,58762	0,44766	0,31329	0,95052	0,25372	3,27566E-4	0,54427	0,71105	0,71882	0,84209	0,19968	4,17723E-4	0,46466	0,01615	0,47936	0,00599	0,94755	0,68422	0,23014	0,04657	0,21395	0,54765	0,60017	0,25596	0,03872	0,72213	0,01627	2,86479E-4	0,62384	4,33182E-8	0,02279	6,00706E-4	0,32111	0,35559	0,27591	0,31238	0,20425	0,08107
"TGF-a"	Spearman Corr.	0,41609*	-0,22777	0,07237	1	0,26134	0,40216*	0,41585*	0,34498*	0,28365	0,32445*	-0,02173	0,12531	0,10069	0,0608	0,05458	0,5382*	0,19012	0,22011	0,18434	0,13703	0,26836	0,22451	0,10415	0,40636*	0,40467*	0,53874*	0,2488	-0,03404	0,02827	0,4156*	0,22735	0,27797	0,13726	-0,07057	-0,08028	0,18619	0,18536	-0,10803	0,07562	0,18038	0,2641	-0,17764	-0,08852
	p-value	0,00215	0,11549	0,59952	--	0,07937	0,00617	0,00196	0,01634	0,08014	0,0411	0,87487	0,37129	0,48657	0,67815	0,69229	2,69792E-5	0,16444	0,13276	0,17789	0,3231	0,05203	0,13815	0,46248	0,01026	0,00711	2,20379E-5	0,09934	0,8051	0,8392	0,00178	0,1016	0,05313	0,31764	0,60868	0,56015	0,3076	0,17547	0,43239	0,5832	0,21487	0,0667	0,30729	0,55406
"G-CSF"	Spearman Corr.	0,20497	0,02687	0,37432*	0,26134	1	0,20051	0,3115*	0,01672	0,1767	0,49733*	0,37271*	0,04771	0,26138	0,02057	-0,00396	0,37561*	0,23044	0,15522	0,35682*	0,26397	0,52999*	0,36781*	0,21716	0,19802	0,24689	0,43554*	0,26619	0,01104	0,29081*	0,20991	0,13363	0,54234*	0,45897*	-0,12335	0,47318*	0,56686*	0,28695	-0,04328	0,25346	0,097	0,37462*	0,15515	0,14103
	p-value	0,18197	0,86757	0,01038	0,07937	--	0,22743	0,03726	0,91628	0,32525	0,00378	0,01074	0,75842	0,0988	0,89582	0,97918	0,011	0,12338	0,33252	0,01493	0,07975	2,15611E-4	0,02124	0,16186	0,25417	0,14071	0,00248	0,10623	0,94194	0,04992	0,16637	0,38149	2,07164E-4	0,00134	0,4141	8,96667E-4	0,00134	0,05317	0,77518	0,08921	0,55156	0,01451	0,41298	0,3918
"Flt-3L"	Spearman Corr.	0,34148*	0,02497	0,08304	0,40216*	0,20051	1	0,35232*	0,15612	0,21348	0,40934*	-0,0261	0,14585	0,13286	0,40427*	0,21207	0,4163*	-0,1289	0,18057	-0,06472	0,35526*	-0,04876	0,41838*	0,37936*	0,28863	0,08755	0,37793*	0,24933	-0,02421	0,06643	0,30583*	0,18307	0,23639	0,0867	-0,11025	0,10478	0,00275	0,01087	-0,17754	0,18312	-0,00506	0,35018*	-0,08695	-0,27757
	p-value	0,02502	0,87687	0,58762	0,00617	0,22743	--	0,019	0,32968	0,24887	0,01622	0,86487	0,35071	0,41377	0,00967	0,16194	0,00494	0,39872	0,27131	0,67277	0,01796	0,75329	0,00997	0,01322	0,11533	0,61166	0,01048	0,13115	0,87458	0,66833	0,0435	0,23427	0,13675	0,5712	0,47091	0,49333	0,98913	0,94348	0,24331	0,22857	0,97496	0,02675	0,65381	0,09625
"GM-CSF"	Spearman Corr.	0,38317*	-0,33423*	0,10654	0,41585*	0,3115*	0,35232*	1	0,28272	0,50826*	0,35575*	0,02787	0,26024	0,21148	0,10412	-0,15534	0,40078*	0,00924	0,11302	0,1105	0,03403	0,1245	0,4243*	0,17393	0,37208*	0,45358*	0,62301*	-0,05402	-0,06565	0,07105	0,34733*	0,28117*	0,12563	0,41555*	-0,00908	0,12277	0,12	-0,03039	-0,1105	0,08978	0,0844	0,26483	-0,04572	-0,11235
	p-value	0,00602	0,02167	0,44766	0,00196	0,03726	0,019	--	0,05694	0,00112	0,02838	0,84298	0,06514	0,14903	0,48613	0,26672	0,00324	0,94763	0,45457	0,43088	0,81069	0,38406	0,00457	0,22705	0,02335	0,0029	6,29677E-7	0,7308	0,64047	0,6167	0,01164	0,04564	0,39488	0,00197	0,94855	0,38115	0,52022	0,82898	0,43088	0,52264	0,57271	0,07203	0,79735	0,46246
"Fractalkine"	Spearman Corr.	0,34733*	0,24314	0,14865	0,34498*	0,01672	0,15612	0,28272	1	0,42099*	0,17014	-0,07669	0,14016	0,26073	0,25252	-0,06924	0,1331	-0,15686	0,36494*	-0,08382	0,11715	0,09488	-0,01935	0,05439	0,26778	0,30748	0,16505	0,13475	0,34336*	0,17856	0,20233	0,23866	0,32378*	-0,00636	0,30981*	0,04754	-0,10973	0,11525	0,18085	0,36241*	0,32445*	0,00357	-0,26711	-0,22551
	p-value	0,01803	0,11175	0,31329	0,01634	0,91628	0,32968	0,05694	--	0,0147	0,32115	0,60439	0,35287	0,09128	0,09818	0,64005	0,37246	0,28699	0,01897	0,57113	0,43289	0,52585	0,90564	0,72271	0,12574	0,05689	0,26227	0,40712	0,01688	0,22982	0,17259	0,10619	0,03417	0,96576	0,03212	0,74832	0,58585	0,43536	0,21866	0,01136	0,03378	0,98163	0,1536	0,16177
"IFNa2"	Spearman Corr.	0,23587	-0,04254	0,01027	0,28365	0,1767	0,21348	0,50826*	0,42099*	1	0,35607*	0,10169	0,26154	0,27274	0,11348	-0,05206	0,19463	0,11928	0,13756	0,21435	0,03676	0,14926	0,18994	0,35359*	-0,06535	0,27924	0,36058*	0,02192	0,15176	0,20352	0,24751	0,23238	0,20227	0,23787	0,16788	0,12619	0,2031	0,22356	-9,15155E-4	0,23271	0,06738	0,10858	0,17183	0,28085
	p-value	0,1483	0,80258	0,95052	0,08014	0,32525	0,24887	0,00112	0,0147	--	0,04548	0,5379	0,10777	0,10243	0,52282	0,75294	0,24161	0,46954	0,44523	0,19008	0,82657	0,37112	0,29776	0,0318	0,76159	0,10427	0,02413	0,89901	0,35639	0,22038	0,12873	0,16034	0,22991	0,14478	0,30698	0,44398	0,3096	0,17128	0,99559	0,15397	0,69621	0,52236	0,42207	0,10221
"IFNy"	Spearman Corr.	0,14676	0,11789	0,18476	0,32445*	0,49733*	0,40934*	0,35575*	0,17014	0,35607*	1	0,13072	0,23542	0,24124	0,54096*	-0,10492	0,42826*	0,1022	-0,08891	0,1625	0,15409	0,59837*	0,27706	0,25368	-0,04161	0,21499	0,28665	0,18496	0,03565	0,0131	0,25735	0,24216	0,25488	0,3697*	0,08257	0,23746	0,10903	0,01123	0,06049	0,46637*	0,11903	0,3516*	0,10798	0,01995
	p-value	0,37265	0,4871	0,25372	0,0411	0,00378	0,01622	0,02838	0,32115	0,04548	--	0,42141	0,15478	0,15033	6,57881E-4	0,51936	0,00653	0,53033	0,61705	0,31642	0,34896	5,73625E-5	0,13828	0,12434	0,84345	0,21487	0,07292	0,28746	0,82713	0,9369	0,11374	0,13747	0,1279	0,01888	0,6125	0,1401	0,62911	0,94519	0,71079	0,00242	0,48289	0,03285	0,60742	0,91085
"GRO"	Spearman Corr.	0,20489	-0,0356	0,46679*	-0,02173	0,37271*	-0,0261	0,02787	-0,07669	0,10169	0,13072	1	0,00184	-0,17697	-0,1589	0,0154	0,07099	0,54252*	0,03731	0,54818*	-0,01508	0,39206*	-0,12255	0,08115	-0,17501	0,10826	0,21447	-0,11647	-0,14827	0,29167*	0,21603	-0,16332	0,28778*	0,51677*	-0,10217	0,44872*	0,72225*	0,32844*	0,33443*	0,18744	-0,11613	-0,06802	0,2079	0,43345*
	p-value	0,1451	0,80813	3,27566E-4	0,87487	0,01074	0,86487	0,84298	0,60439	0,5379	0,42141	--	0,98959	0,21891	0,27548	0,91112	0,61	1,87985E-5	0,8012	1,4753E-5	0,91379	0,00369	0,42256	0,56739	0,28661	0,48956	0,11587	0,44612	0,27998	0,03236	0,11666	0,2426	0,04495	5,3631E-5	0,45794	5,90347E-4	3,05886E-6	0,01436	0,01258	0,17057	0,42685	0,64238	0,23075	0,00234
"IL-10"	Spearman Corr.	0,19446	0,31259*	0,08517	0,12531	0,04771	0,14585	0,26024	0,14016	0,26154	0,23542	0,00184	1	0,3368*	0,36557*	-0,09659	0,32309*	0,04123	0,31421*	-0,05023	0,25902	0,19182	0,40833*	0,35012*	0,28496	0,51219*	0,26517	0,15554	0,36335*	0,28286*	0,44286*	0,42121*	0,3088*	0,30334*	0,27363*	-0,04769	0,22219	0,04035	-0,08783	0,30862*	0,43075*	0,32412*	-0,27082	-0,03418
	p-value	0,17599	0,03242	0,54427	0,37129	0,75842	0,35071	0,06514	0,35287	0,10777	0,15478	0,98959	--	0,01797	0,01151	0,49144	0,01948	0,76941	0,03345	0,72095	0,06371	0,17311	0,00656	0,01268	0,08736	4,46318E-4	0,05499	0,31925	0,00749	0,04217	8,97866E-4	0,00208	0,03469	0,02724	0,04742	0,73454	0,22161	0,77423	0,53171	0,02455	0,00224	0,02624	0,12741	0,82361
"MCP-3"	Spearman Corr.	0,16141	0,38567*	0,05371	0,10069	0,26138	0,13286	0,21148	0,26073	0,27274	0,24124	-0,17697	0,3368*	1	0,22372	-0,10982	0,05231	-0,09791	0,58738*	-0,05885	0,35481*	0,17242	0,42778*	0,42727*	0,6548*	0,59325*	0,2102	0,52146*	0,30912*	0,46637*	0,4252*	0,7576*	0,37105*	0,29007*	-0,08571	0,12313	0,11277	0,01021	-0,2108	0,31836*	0,7885*	0,5032*	-0,05795	-0,11839
	p-value	0,27308	0,00972	0,71105	0,48657	0,0988	0,41377	0,14903	0,09128	0,10243	0,15033	0,21891	0,01797	--	0,14434	0,44772	0,72111	0,49877	3,46165E-5	0,68477	0,01236	0,23615	0,00527	0,00274	1,97463E-5	5,47537E-5	0,14287	4,72027E-4	0,02894	7,31251E-4	0,00208	4,56805E-10	0,0121	0,04101	0,55399	0,39428	0,56027	0,9439	0,1417	0,02425	7,70684E-11	4,98487E-4	0,75273	0,44405
"IL-12P40"	Spearman Corr.	0,09697	0,41364*	0,05276	0,0608	0,02057	0,40427*	0,10412	0,25252	0,11348	0,54096*	-0,1589	0,36557*	0,22372	1	-0,18816	0,20767	-0,18024	-0,12415	-0,21385	0,30077*	0,26163	0,2194	0,17677	0,05276	0,1034	0,20562	0,38059*	0,44124*	0,04718	0,2022	0,2619	0,1575	-0,09051	0,12738	-0,02309	-0,11277	-0,19634	-0,04929	0,31012*	0,25281	0,34094*	-0,28853	-0,27231
	p-value	0,52147	0,00525	0,71882	0,67815	0,89582	0,00967	0,48613	0,09818	0,52282	6,57881E-4	0,27548	0,01151	0,14434	--	0,19542	0,15666	0,21523	0,42201	0,14009	0,03778	0,07566	0,1796	0,23992	0,75991	0,53107	0,15637	0,01541	0,00151	0,75016	0,16814	0,07535	0,31312	0,53625	0,38309	0,87489	0,56776	0,17635	0,73664	0,03011	0,10192	0,02353	0,11545	0,08104
"MDC"	Spearman Corr.	0,16655	-0,04912	0,02749	0,05458	-0,00396	0,21207	-0,15534	-0,06924	-0,05206	-0,10492	0,0154	-0,09659	-0,10982	-0,18816	1	-0,03616	0,13276	0,0579	0,1101	7,24652E-4	-0,13435	-0,11397	0,01679	0,0078	-0,15223	-0,03909	-0,03242	-0,3524*	-0,04555	0,02529	-0,10034	-0,11869	0,05552	0,02677	0,12951	-0,01779	0,12937	-0,03571	-0,14675	-0,17648	0,01499	0,23482	0,12933
	p-value	0,23798	0,73751	0,84209	0,69229	0,97918	0,16194	0,26672	0,64005	0,75294	0,51936	0,91112	0,49144	0,44772	0,19542	--	0,79518	0,33394	0,6959	0,42359	0,99585	0,3375	0,456	0,90596	0,96242	0,3298	0,7769	0,83258	0,00832	0,7436	0,85594	0,47468	0,41665	0,68723	0,84618	0,346	0,92299	0,34653	0,79574	0,28501	0,22512	0,91858	0,17451	0,38627
"IL-12P70"	Spearman Corr.	0,49737*	-0,23377	0,17729	0,5382*	0,37561*	0,4163*	0,40078*	0,1331	0,19463	0,42826*	0,07099	0,32309*	0,05231	0,20767	-0,03616	1	-0,0596	0,07474	0,01294	-0,09357	0,17784	0,29111	0,25131	0,27362	0,30805*	0,62914*	0,17949	-0,06055	0,03068	0,41617*	0,11767	0,31474*	0,20669	0,28042*	-0,00962	0,19634	0,21834	-0,12864	0,09056	0,05278	0,19627	0,12125	0,02479
	p-value	2,04737E-4	0,10979	0,19968	2,69792E-5	0,011	0,00494	0,00324	0,37246	0,24161	0,00653	0,61	0,01948	0,72111	0,15666	0,79518	--	0,66856	0,61367	0,92598	0,50097	0,20718	0,05236	0,07526	0,09189	0,04718	3,48229E-7	0,2437	0,66359	0,82735	0,00194	0,40611	0,02935	0,13372	0,03999	0,94495	0,28977	0,11272	0,3539	0,51491	0,71871	0,18122	0,48777	0,87009
"PDGF-AA"	Spearman Corr.	0,02711	0,01452	0,45945*	0,19012	0,23044	-0,1289	0,00924	-0,15686	0,11928	0,1022	0,54252*	0,04123	-0,09791	-0,18024	0,13276	-0,0596	1	0,00853	0,77172*	0,12918	0,57889*	-0,26243	0,08377	-0,24295	0,16214	0,10312	-0,0509	-0,03464	0,08241	0,1962	-0,05928	0,14043	0,36521*	-0,09437	0,39776*	0,43533*	0,39413*	0,06443	0,08974	0,02936	0,10068	0,13454	0,34016*
	p-value	0,84871	0,92115	4,17723E-4	0,16444	0,12338	0,39872	0,94763	0,28699	0,46954	0,53033	1,87985E-5	0,76941	0,49877	0,21523	0,33394	0,66856	--	0,95413	5,33428E-12	0,35187	5,60436E-6	0,08158	0,55489	0,13615	0,29892	0,45372	0,73983	0,80176	0,55357	0,15505	0,67326	0,33584	0,00611	0,49313	0,00264	0,01277	0,00291	0,64026	0,51469	0,84127	0,49126	0,44099	0,01931
"IL-13"	Spearman Corr.	0,15934	0,18999	0,10808	0,22011	0,15522	0,18057	0,11302	0,36494*	0,13756	-0,08891	0,03731	0,31421*	0,58738*	-0,12415	0,0579	0,07474	0,00853	1	0,10124	0,17439	0,15141	0,42255*	0,46576*	0,60722*	0,58167*	0,07182	0,2535	0,14956	0,51175*	0,28504	0,61482*	0,45269*	0,40198*	-0,11123	0,15935	0,1792	0,04383	-0,07098	0,33837*	0,62074*	0,32795*	0,03393	0,012
	p-value	0,29579	0,22235	0,46466	0,13276	0,33252	0,27131	0,45457	0,01897	0,44523	0,61705	0,8012	0,03345	3,46165E-5	0,42201	0,6959	0,61367	0,95413	--	0,49356	0,23582	0,31517	0,00531	0,00126	6,74793E-5	1,59448E-4	0,6276	0,12462	0,31031	2,01048E-4	0,05214	5,46838E-6	0,0023	0,00462	0,45166	0,27933	0,34337	0,76739	0,63163	0,01866	5,38876E-6	0,02976	0,85374	0,94062
"PDGF-AB/BB"	Spearman Corr.	0,20571	-0,18298	0,32302*	0,18434	0,35682*	-0,06472	0,1105	-0,08382	0,21435	0,1625	0,54818*	-0,05023	-0,05885	-0,21385	0,1101	0,01294	0,77172*	0,10124	1	0,18425	0,60506*	-0,08541	0,11705	-0,10188	0,1551	0,12251	-0,08273	-0,26392	0,08451	0,1922	-0,12147	0,05633	0,39771*	-0,14113	0,42359*	0,22234	0,38882*	0,10613	0,13434	-0,03993	0,04108	0,33309	0,39591*
	p-value	0,14345	0,20824	0,01615	0,17789	0,01493	0,67277	0,43088	0,57113	0,19008	0,31642	1,4753E-5	0,72095	0,68477	0,14009	0,42359	0,92598	5,33428E-12	0,49356	--	0,18229	1,59464E-6	0,57695	0,40858	0,53714	0,32064	0,37291	0,58902	0,05153	0,54348	0,16382	0,38623	0,70068	0,00264	0,30408	0,00127	0,22129	0,00335	0,44059	0,32815	0,7853	0,77928	0,05055	0,00587
"IL-15"	Spearman Corr.	0,04535	0,4977*	0,09832	0,13703	0,26397	0,35526*	0,03403	0,11715	0,03676	0,15409	-0,01508	0,25902	0,35481*	0,30077*	7,24652E-4	-0,09357	0,12918	0,17439	0,18425	1	0,1617	0,02429	0,15623	0,2822	0,19305	0,01481	0,35065*	0,3827*	0,30433*	0,16585	0,3523*	0,21036	0,04234	0,05313	0,13662	0,21447	0,04369	-0,02235	0,23885	0,29783*	0,40033*	0,03087	0,01332
	p-value	0,75202	3,19111E-4	0,47936	0,3231	0,07975	0,01796	0,81069	0,43289	0,82657	0,34896	0,91379	0,06371	0,01236	0,03778	0,99585	0,50097	0,35187	0,23582	0,18229	--	0,25212	0,87413	0,27363	0,08176	0,22062	0,91537	0,01961	0,00429	0,02672	0,23528	0,01042	0,15125	0,76115	0,7028	0,3246	0,24662	0,75376	0,87256	0,08197	0,03767	0,00481	0,86028	0,92999
"sCD40L"	Spearman Corr.	0,10877	0,16497	0,37269*	0,26836	0,52999*	-0,04876	0,1245	0,09488	0,14926	0,59837*	0,39206*	0,19182	0,17242	0,26163	-0,13435	0,17784	0,57889*	0,15141	0,60506*	0,1617	1	0,068	0,21895	-0,04068	0,42876*	0,244	0,22601	0,21617	0,32147*	0,33013*	0,13523	0,31221*	0,4392*	-0,05746	0,43813*	0,32836	0,21121	0,10879	0,43504*	0,22773	0,28021	0,04753	0,2355
	p-value	0,45212	0,26249	0,00599	0,05203	2,15611E-4	0,75329	0,38406	0,52585	0,37112	5,73625E-5	0,00369	0,17311	0,23615	0,07566	0,3375	0,20718	5,60436E-6	0,31517	1,59464E-6	0,25212	--	0,66482	0,12661	0,81105	0,00461	0,07829	0,14503	0,12002	0,02013	0,01577	0,33913	0,03264	0,001	0,68279	0,00103	0,07132	0,12898	0,43811	0,00113	0,11556	0,05643	0,78951	0,1194
"IL-17A"	Spearman Corr.	0,35892*	0,02234	0,01009	0,22451	0,36781*	0,41838*	0,4243*	-0,01935	0,18994	0,27706	-0,12255	0,40833*	0,42778*	0,2194	-0,11397	0,29111	-0,26243	0,42255*	-0,08541	0,02429	0,068	1	0,54452*	0,58661*	0,4807*	0,38286*	0,46373*	0,0675	0,33283*	0,34692*	0,52197*	0,2601	0,42367*	-0,13019	-0,01273	-0,10318	-0,18823	-0,44625*	0,2615	0,3756*	0,6792*	0,1221	-0,07721
	p-value	0,0181	0,89118	0,94755	0,13815	0,02124	0,00997	0,00457	0,90564	0,29776	0,13828	0,42256	0,00656	0,00527	0,1796	0,456	0,05236	0,08158	0,00531	0,57695	0,87413	0,66482	--	1,92971E-4	1,69861E-4	0,00401	0,00944	0,00384	0,65951	0,02549	0,02105	2,79187E-4	0,10504	0,00373	0,39398	0,93386	0,60132	0,21561	0,00212	0,08272	0,01552	1,44803E-6	0,52039	0,63582
"IL-1RA"	Spearman Corr.	0,1482	0,20429	0,05776	0,10415	0,21716	0,37936*	0,17393	0,05439	0,35359*	0,25368	0,08115	0,35012*	0,42727*	0,17677	0,01679	0,25131	0,08377	0,46576*	0,11705	0,15623	0,21895	0,54452*	1	0,49244*	0,56786*	0,23304	0,40354*	0,21475	0,36518*	0,52131*	0,60725*	0,26735	0,35872*	0,12812	0,08181	0,11455	0,01079	-0,26619	0,38356*	0,526*	0,59415*	0,14971	0,22535
	p-value	0,30951	0,17325	0,68422	0,46248	0,16186	0,01322	0,22705	0,72271	0,0318	0,12434	0,56739	0,01268	0,00274	0,23992	0,90596	0,07526	0,55489	0,00126	0,40858	0,27363	0,12661	1,92971E-4	--	0,00169	1,32501E-4	0,09639	0,00729	0,1263	0,00842	8,76292E-5	2,92816E-6	0,06926	0,00902	0,36539	0,56424	0,53946	0,9395	0,05647	0,005	1,73845E-4	1,06777E-5	0,40565	0,13665
"IL-1a"	Spearman Corr.	0,41192*	0,1715	0,19667	0,40636*	0,19802	0,28863	0,37208*	0,26778	-0,06535	-0,04161	-0,17501	0,28496	0,6548*	0,05276	0,0078	0,27362	-0,24295	0,60722*	-0,10188	0,2822	-0,04068	0,58661*	0,49244*	1	0,75445*	0,37095*	0,57508*	0,05564	0,34103*	0,46772*	0,72795*	0,3625*	0,266	-0,03828	-0,05509	-0,07278	-0,07737	-0,25277	0,21637	0,78176*	0,5837*	-0,09119	-0,14451
	p-value	0,01255	0,33994	0,23014	0,01026	0,25417	0,11533	0,02335	0,12574	0,76159	0,84345	0,28661	0,08736	1,97463E-5	0,75991	0,96242	0,09189	0,13615	6,74793E-5	0,53714	0,08176	0,81105	1,69861E-4	0,00169	--	2,27395E-6	0,02008	8,86294E-4	0,73653	0,03362	0,00307	3,29541E-7	0,03815	0,10168	0,81703	0,73905	0,73538	0,63967	0,12053	0,18583	2,95214E-8	2,90404E-4	0,66465	0,41484
"IL-9"	Spearman Corr.	0,26588	0,14071	0,30521*	0,40467*	0,24689	0,08755	0,45358*	0,30748	0,27924	0,21499	0,10826	0,51219*	0,59325*	0,1034	-0,15223	0,30805*	0,16214	0,58167*	0,1551	0,19305	0,42876*	0,4807*	0,56786*	0,75445*	1	0,44682*	0,40683*	0,32417*	0,49453*	0,72759*	0,78248*	0,36682*	0,52396*	0,0571	0,17023	0,32774	0,12482	-0,06367	0,38841*	0,76136*	0,47549*	-0,21552	0,17612
	p-value	0,09292	0,3802	0,04657	0,00711	0,14071	0,61166	0,0029	0,05689	0,10427	0,21487	0,48956	4,46318E-4	5,47537E-5	0,53107	0,3298	0,04718	0,29892	1,59448E-4	0,32064	0,22062	0,00461	0,00401	1,32501E-4	2,27395E-6	--	0,00267	0,0138	0,03394	8,71538E-4	3,25133E-8	1,51287E-9	0,02162	3,10966E-4	0,71611	0,27512	0,10216	0,42515	0,685	0,01006	1,82852E-8	0,00168	0,30083	0,31152
"IL-1b"	Spearman Corr.	0,57794*	-0,09004	0,17026	0,53874*	0,43554*	0,37793*	0,62301*	0,16505	0,36058*	0,28665	0,21447	0,26517	0,2102	0,20562	-0,03909	0,62914*	0,10312	0,07182	0,12251	0,01481	0,244	0,38286*	0,23304	0,37095*	0,44682*	1	0,32018*	-0,02677	0,22762	0,44473*	0,24138	0,27459	0,3426*	0,08194	0,07125	0,25496	0,0882	-0,14543	0,1444	0,14598	0,32315*	0,1044	-0,08743
	p-value	7,23749E-6	0,5384	0,21395	2,20379E-5	0,00248	0,01048	6,29677E-7	0,26227	0,02413	0,07292	0,11587	0,05499	0,14287	0,15637	0,7769	3,48229E-7	0,45372	0,6276	0,37291	0,91537	0,07829	0,00944	0,09639	0,02008	0,00267	--	0,03202	0,84616	0,09786	7,53732E-4	0,08164	0,05621	0,01045	0,55204	0,6052	0,15905	0,52195	0,28942	0,29289	0,31691	0,02352	0,55062	0,55895
"IL-2"	Spearman Corr.	0,16023	0,50949*	0,09203	0,2488	0,26619	0,24933	-0,05402	0,13475	0,02192	0,18496	-0,11647	0,15554	0,52146*	0,38059*	-0,03242	0,17949	-0,0509	0,2535	-0,08273	0,35065*	0,22601	0,46373*	0,40354*	0,57508*	0,40683*	0,32018*	1	0,47246*	0,47957*	0,3592*	0,54052*	0,42773*	-0,04444	0,00594	-0,0684	0,0461	-0,06074	-0,10372	0,42923*	0,57269*	0,44679*	0,25352	-0,10075
	p-value	0,29308	6,6822E-4	0,54765	0,09934	0,10623	0,13115	0,7308	0,40712	0,89901	0,28746	0,44612	0,31925	4,72027E-4	0,01541	0,83258	0,2437	0,73983	0,12462	0,58902	0,01961	0,14503	0,00384	0,00729	8,86294E-4	0,0138	0,03202	--	0,00105	9,88099E-4	0,01664	1,82746E-4	0,00472	0,77193	0,9691	0,65528	0,81582	0,69183	0,49775	0,00326	1,12629E-4	0,00302	0,19302	0,5362
"IL-3"	Spearman Corr.	-0,08352	0,65127*	0,07224	-0,03404	0,01104	-0,02421	-0,06565	0,34336*	0,15176	0,03565	-0,14827	0,36335*	0,30912*	0,44124*	-0,3524*	-0,06055	-0,03464	0,14956	-0,26392	0,3827*	0,21617	0,0675	0,21475	0,05564	0,32417*	-0,02677	0,47246*	1	0,41245*	0,13261	0,40644*	0,45708*	-0,18482	0,16658	-0,06205	0,29412	-0,14684	-0,01197	0,35368*	0,512*	0,27298	-0,20686	-0,13133
	p-value	0,55608	4,03343E-7	0,60017	0,8051	0,94194	0,87458	0,64047	0,01688	0,35639	0,82713	0,27998	0,00749	0,02894	0,00151	0,00832	0,66359	0,80176	0,31031	0,05153	0,00429	0,12002	0,65951	0,1263	0,73653	0,03394	0,84616	0,00105	--	0,00194	0,33912	0,00253	9,61247E-4	0,17675	0,22416	0,65269	0,10226	0,2847	0,93089	0,00808	1,69582E-4	0,05773	0,23314	0,3789
"IL-4"	Spearman Corr.	0,28415*	0,44815*	0,1573	0,02827	0,29081*	0,06643	0,07105	0,17856	0,20352	0,0131	0,29167*	0,28286*	0,46637*	0,04718	-0,04555	0,03068	0,08241	0,51175*	0,08451	0,30433*	0,32147*	0,33283*	0,36518*	0,34103*	0,49453*	0,22762	0,47957*	0,41245*	1	0,29008*	0,40521*	0,48929*	0,36444*	0,14158	0,15112	0,45601*	0,02865	0,09332	0,39264*	0,55678*	0,41521*	0,09156	0,09626
	p-value	0,0433	0,0014	0,25596	0,8392	0,04992	0,66833	0,6167	0,22982	0,22038	0,9369	0,03236	0,04217	7,31251E-4	0,75016	0,7436	0,82735	0,55357	2,01048E-4	0,54348	0,02672	0,02013	0,02549	0,00842	0,03362	8,71538E-4	0,09786	9,88099E-4	0,00194	--	0,03511	0,00288	4,16819E-4	0,00674	0,30714	0,27535	0,00872	0,83705	0,5021	0,00332	3,96076E-5	0,00334	0,60092	0,52454
"IL-5"	Spearman Corr.	0,39542*	-0,03911	0,28216*	0,4156*	0,20991	0,30583*	0,34733*	0,20233	0,24751	0,25735	0,21603	0,44286*	0,4252*	0,2022	0,02529	0,41617*	0,1962	0,28504	0,1922	0,16585	0,33013*	0,34692*	0,52131*	0,46772*	0,72759*	0,44473*	0,3592*	0,13261	0,29008*	1	0,51948*	0,14728	0,43432*	0,00332	0,18835	0,30495	0,2256	-0,09053	0,29456*	0,35766*	0,50003*	-0,14297	0,1454
	p-value	0,00408	0,79183	0,03872	0,00178	0,16637	0,0435	0,01164	0,17259	0,12873	0,11374	0,11666	8,97866E-4	0,00208	0,16814	0,85594	0,00194	0,15505	0,05214	0,16382	0,23528	0,01577	0,02105	8,76292E-5	0,00307	3,25133E-8	7,53732E-4	0,01664	0,33912	0,03511	--	7,93554E-5	0,31782	0,00103	0,981	0,1726	0,08967	0,10095	0,51503	0,0306	0,01163	2,96011E-4	0,41987	0,33497
"IL-6"	Spearman Corr.	0,0774	0,31358*	0,05001	0,22735	0,13363	0,18307	0,28117*	0,23866	0,23238	0,24216	-0,16332	0,42121*	0,7576*	0,2619	-0,10034	0,11767	-0,05928	0,61482*	-0,12147	0,3523*	0,13523	0,52197*	0,60725*	0,72795*	0,78248*	0,24138	0,54052*	0,40644*	0,40521*	0,51948*	1	0,28187	0,29422*	0,04255	0,0171	0,14534	-0,08923	-0,23331	0,42934*	0,77438*	0,59246*	-0,14412	0,04816
	p-value	0,59319	0,02998	0,72213	0,1016	0,38149	0,23427	0,04564	0,10619	0,16034	0,13747	0,2426	0,00208	4,56805E-10	0,07535	0,47468	0,40611	0,67326	5,46838E-6	0,38623	0,01042	0,33913	2,79187E-4	2,92816E-6	3,29541E-7	1,51287E-9	0,08164	1,82746E-4	0,00253	0,00288	7,93554E-5	--	0,05493	0,03248	0,76227	0,90327	0,43533	0,52517	0,0927	0,00134	1,0699E-10	1,14773E-5	0,40881	0,75063
"IL-7"	Spearman Corr.	0,18983	0,38088*	0,34169*	0,27797	0,54234*	0,23639	0,12563	0,32378*	0,20227	0,25488	0,28778*	0,3088*	0,37105*	0,1575	-0,11869	0,31474*	0,14043	0,45269*	0,05633	0,21036	0,31221*	0,2601	0,26735	0,3625*	0,36682*	0,27459	0,42773*	0,45708*	0,48929*	0,14728	0,28187	1	0,17751	-0,04686	0,18151	0,52449*	0,1081	0,19256	0,41198*	0,51747*	0,23129	0,09475	-0,11107
	p-value	0,20123	0,00985	0,01627	0,05313	2,07164E-4	0,13675	0,39488	0,03417	0,22991	0,1279	0,04495	0,03469	0,0121	0,31312	0,41665	0,02935	0,33584	0,0023	0,70068	0,15125	0,03264	0,10504	0,06926	0,03815	0,02162	0,05621	0,00472	9,61247E-4	4,16819E-4	0,31782	0,05493	--	0,22239	0,74917	0,21196	0,00293	0,4597	0,18498	0,00327	3,21801E-4	0,12197	0,61215	0,48376
"IL-8"	Spearman Corr.	0,37763*	-0,09911	0,47077*	0,13726	0,45897*	0,0867	0,41555*	-0,00636	0,23787	0,3697*	0,51677*	0,30334*	0,29007*	-0,09051	0,05552	0,20669	0,36521*	0,40198*	0,39771*	0,04234	0,4392*	0,42367*	0,35872*	0,266	0,52396*	0,3426*	-0,04444	-0,18482	0,36444*	0,43432*	0,29422*	0,17751	1	0,00952	0,54065*	0,42088*	0,22218	-0,12613	0,2887*	0,21433	0,36825*	0,29729	0,31556*
	p-value	0,00578	0,49807	2,86479E-4	0,31764	0,00134	0,5712	0,00197	0,96576	0,14478	0,01888	5,3631E-5	0,02724	0,04101	0,53625	0,68723	0,13372	0,00611	0,00462	0,00264	0,76115	0,001	0,00373	0,00902	0,10168	3,10966E-4	0,01045	0,77193	0,17675	0,00674	0,00103	0,03248	0,22239	--	0,94498	2,03416E-5	0,01645	0,10302	0,35885	0,03255	0,13919	0,00923	0,08285	0,03072
"IP-10"	Spearman Corr.	0,15928	0,17899	0,0676	-0,07057	-0,12335	-0,11025	-0,00908	0,30981*	0,16788	0,08257	-0,10217	0,27363*	-0,08571	0,12738	0,02677	0,28042*	-0,09437	-0,11123	-0,14113	0,05313	-0,05746	-0,13019	0,12812	-0,03828	0,0571	0,08194	0,00594	0,16658	0,14158	0,00332	0,04255	-0,04686	0,00952	1	-0,02706	-0,11759	0,15707	0,1267	0,13362	0,01976	0,07725	0,20621	-0,02038
	p-value	0,25938	0,21849	0,62384	0,60868	0,4141	0,47091	0,94855	0,03212	0,30698	0,6125	0,45794	0,04742	0,55399	0,38309	0,84618	0,03999	0,49313	0,45166	0,30408	0,7028	0,68279	0,39398	0,36539	0,81703	0,71611	0,55204	0,9691	0,22416	0,30714	0,981	0,76227	0,74917	0,94498	--	0,84455	0,52154	0,2521	0,35666	0,33078	0,89279	0,5978	0,23465	0,89186
"MCP-1"	Spearman Corr.	0,12657	0,0436	0,6596*	-0,08028	0,47318*	0,10478	0,12277	0,04754	0,12619	0,23746	0,44872*	-0,04769	0,12313	-0,02309	0,12951	-0,00962	0,39776*	0,15935	0,42359*	0,13662	0,43813*	-0,01273	0,08181	-0,05509	0,17023	0,07125	-0,0684	-0,06205	0,15112	0,18835	0,0171	0,18151	0,54065*	-0,02706	1	0,32636	0,43533*	0,06429	0,3617*	0,00572	0,20473	0,30317	0,12747
	p-value	0,37127	0,76613	4,33182E-8	0,56015	8,96667E-4	0,49333	0,38115	0,74832	0,44398	0,1401	5,90347E-4	0,73454	0,39428	0,87489	0,346	0,94495	0,00264	0,27933	0,00127	0,3246	0,00103	0,93386	0,56424	0,73905	0,27512	0,6052	0,65528	0,65269	0,27535	0,1726	0,90327	0,21196	2,03416E-5	0,84455	--	0,0683	8,94887E-4	0,64101	0,00666	0,96889	0,15821	0,07666	0,39317
"MIP-1a"	Spearman Corr.	0,04369	0,03311	0,40139*	0,18619	0,56686*	0,00275	0,12	-0,10973	0,2031	0,10903	0,72225*	0,22219	0,11277	-0,11277	-0,01779	0,19634	0,43533*	0,1792	0,22234	0,21447	0,32836	-0,10318	0,11455	-0,07278	0,32774	0,25496	0,0461	0,29412	0,45601*	0,30495	0,14534	0,52449*	0,42088*	-0,11759	0,32636	1	0,31572	-0,03137	0,10377	0,11479	0,16483	-0,03116	0,30207
	p-value	0,81549	0,86461	0,02279	0,3076	0,00134	0,98913	0,52022	0,58585	0,3096	0,62911	3,05886E-6	0,22161	0,56027	0,56776	0,92299	0,28977	0,01277	0,34337	0,22129	0,24662	0,07132	0,60132	0,53946	0,73538	0,10216	0,15905	0,81582	0,10226	0,00872	0,08967	0,43533	0,00293	0,01645	0,52154	0,0683	--	0,07836	0,86466	0,57194	0,55324	0,37557	0,89051	0,11125
"MIP-1b"	Spearman Corr.	0,13914	-0,00897	0,44817*	0,18536	0,28695	0,01087	-0,03039	0,11525	0,22356	0,01123	0,32844*	0,04035	0,01021	-0,19634	0,12937	0,21834	0,39413*	0,04383	0,38882*	0,04369	0,21121	-0,18823	0,01079	-0,07737	0,12482	0,0882	-0,06074	-0,14684	0,02865	0,2256	-0,08923	0,1081	0,22218	0,15707	0,43533*	0,31572	1	-0,00967	0,04354	-0,02681	0,01839	0,06994	0,20815
	p-value	0,32523	0,95122	6,00706E-4	0,17547	0,05317	0,94348	0,82898	0,43536	0,17128	0,94519	0,01436	0,77423	0,9439	0,17635	0,34653	0,11272	0,00291	0,76739	0,00335	0,75376	0,12898	0,21561	0,9395	0,63967	0,42515	0,52195	0,69183	0,2847	0,83705	0,10095	0,52517	0,4597	0,10302	0,2521	8,94887E-4	0,07836	--	0,94415	0,7523	0,85491	0,90018	0,68972	0,16031
"RANTES"	Spearman Corr.	-0,21285	-0,02729	0,13629	-0,10803	-0,04328	-0,17754	-0,1105	0,18085	-9,15155E-4	0,06049	0,33443*	-0,08783	-0,2108	-0,04929	-0,03571	-0,12864	0,06443	-0,07098	0,10613	-0,02235	0,10879	-0,44625*	-0,26619	-0,25277	-0,06367	-0,14543	-0,10372	-0,01197	0,09332	-0,09053	-0,23331	0,19256	-0,12613	0,1267	0,06429	-0,03137	-0,00967	1	0,02605	-0,15457	-0,23645	0,18988	0,21003
	p-value	0,12977	0,85232	0,32111	0,43239	0,77518	0,24331	0,43088	0,21866	0,99559	0,71079	0,01258	0,53171	0,1417	0,73664	0,79574	0,3539	0,64026	0,63163	0,44059	0,87256	0,43811	0,00212	0,05647	0,12053	0,685	0,28942	0,49775	0,93089	0,5021	0,51503	0,0927	0,18498	0,35885	0,35666	0,64101	0,86466	0,94415	--	0,85025	0,28893	0,1019	0,2746	0,15649
"TNFa"	Spearman Corr.	0,20807	0,48404*	0,12698	0,07562	0,25346	0,18312	0,08978	0,36241*	0,23271	0,46637*	0,18744	0,30862*	0,31836*	0,31012*	-0,14675	0,09056	0,08974	0,33837*	0,13434	0,23885	0,43504*	0,2615	0,38356*	0,21637	0,38841*	0,1444	0,42923*	0,35368*	0,39264*	0,29456*	0,42934*	0,41198*	0,2887*	0,13362	0,3617*	0,10377	0,04354	0,02605	1	0,36662*	0,36492*	0,08362	-0,05588
	p-value	0,13883	4,25417E-4	0,35559	0,5832	0,08921	0,22857	0,52264	0,01136	0,15397	0,00242	0,17057	0,02455	0,02425	0,03011	0,28501	0,51491	0,51469	0,01866	0,32815	0,08197	0,00113	0,08272	0,005	0,18583	0,01006	0,29289	0,00326	0,00808	0,00332	0,0306	0,00134	0,00327	0,03255	0,33078	0,00666	0,57194	0,7523	0,85025	--	0,00957	0,00993	0,63295	0,70909
"TNFb"	Spearman Corr.	0,09353	0,53223*	0,15876	0,18038	0,097	-0,00506	0,0844	0,32445*	0,06738	0,11903	-0,11613	0,43075*	0,7885*	0,25281	-0,17648	0,05278	0,02936	0,62074*	-0,03993	0,29783*	0,22773	0,3756*	0,526*	0,78176*	0,76136*	0,14598	0,57269*	0,512*	0,55678*	0,35766*	0,77438*	0,51747*	0,21433	0,01976	0,00572	0,11479	-0,02681	-0,15457	0,36662*	1	0,45306*	-0,19303	-0,05252
	p-value	0,53176	1,67877E-4	0,27591	0,21487	0,55156	0,97496	0,57271	0,03378	0,69621	0,48289	0,42685	0,00224	7,70684E-11	0,10192	0,22512	0,71871	0,84127	5,38876E-6	0,7853	0,03767	0,11556	0,01552	1,73845E-4	2,95214E-8	1,82852E-8	0,31691	1,12629E-4	1,69582E-4	3,96076E-5	0,01163	1,0699E-10	3,21801E-4	0,13919	0,89279	0,96889	0,55324	0,85491	0,28893	0,00957	--	0,00201	0,2818	0,74116
"VEGF"	Spearman Corr.	0,27806	0,32331*	0,14733	0,2641	0,37462*	0,35018*	0,26483	0,00357	0,10858	0,3516*	-0,06802	0,32412*	0,5032*	0,34094*	0,01499	0,19627	0,10068	0,32795*	0,04108	0,40033*	0,28021	0,6792*	0,59415*	0,5837*	0,47549*	0,32315*	0,44679*	0,27298	0,41521*	0,50003*	0,59246*	0,23129	0,36825*	0,07725	0,20473	0,16483	0,01839	-0,23645	0,36492*	0,45306*	1	0,03315	0,06432
	p-value	0,05843	0,0284	0,31238	0,0667	0,01451	0,02675	0,07203	0,98163	0,52236	0,03285	0,64238	0,02624	4,98487E-4	0,02353	0,91858	0,18122	0,49126	0,02976	0,77928	0,00481	0,05643	1,44803E-6	1,06777E-5	2,90404E-4	0,00168	0,02352	0,00302	0,05773	0,00334	2,96011E-4	1,14773E-5	0,12197	0,00923	0,5978	0,15821	0,37557	0,90018	0,1019	0,00993	0,00201	--	0,86196	0,68569
"EDSS"	Spearman Corr.	0,04977	-0,13477	0,21994	-0,17764	0,15515	-0,08695	-0,04572	-0,26711	0,17183	0,10798	0,2079	-0,27082	-0,05795	-0,28853	0,23482	0,12125	0,13454	0,03393	0,33309	0,03087	0,04753	0,1221	0,14971	-0,09119	-0,21552	0,1044	0,25352	-0,20686	0,09156	-0,14297	-0,14412	0,09475	0,29729	0,20621	0,30317	-0,03116	0,06994	0,18988	0,08362	-0,19303	0,03315	1	0,51061*
	p-value	0,78329	0,46977	0,20425	0,30729	0,41298	0,65381	0,79735	0,1536	0,42207	0,60742	0,23075	0,12741	0,75273	0,11545	0,17451	0,48777	0,44099	0,85374	0,05055	0,86028	0,78951	0,52039	0,40565	0,66465	0,30083	0,55062	0,19302	0,23314	0,60092	0,41987	0,40881	0,61215	0,08285	0,23465	0,07666	0,89051	0,68972	0,2746	0,63295	0,2818	0,86196	--	0,00283
"Age"	Spearman Corr.	-0,09031	-0,11976	0,25709	-0,08852	0,14103	-0,27757	-0,11235	-0,22551	0,28085	0,01995	0,43345*	-0,03418	-0,11839	-0,27231	0,12933	0,02479	0,34016*	0,012	0,39591*	0,01332	0,2355	-0,07721	0,22535	-0,14451	0,17612	-0,08743	-0,10075	-0,13133	0,09626	0,1454	0,04816	-0,11107	0,31556*	-0,02038	0,12747	0,30207	0,20815	0,21003	-0,05588	-0,05252	0,06432	0,51061*	1
	p-value	0,55519	0,45579	0,08107	0,55406	0,3918	0,09625	0,46246	0,16177	0,10221	0,91085	0,00234	0,82361	0,44405	0,08104	0,38627	0,87009	0,01931	0,94062	0,00587	0,92999	0,1194	0,63582	0,13665	0,41484	0,31152	0,55895	0,5362	0,3789	0,52454	0,33497	0,75063	0,48376	0,03072	0,89186	0,39317	0,11125	0,16031	0,15649	0,70909	0,74116	0,68569	0,00283	--
2-tailed test of significance is used
*: Correlation is significant at the 0.05 level
